1 Title:

2 Cytoplasmic mRNA decay factors modulate RNA  
3 polymerase II processivity in 5' and 3' gene regions in  
4 yeast

5 Running title:

6 Decay factors modulate Pol II processivity

7 Jonathan Fischer<sup>1</sup>, Yun S. Song<sup>1,2,3</sup>, Nir Yosef<sup>3,4,5</sup>, Julia di Iulio<sup>6</sup>, L.  
8 Stirling Churchman<sup>6</sup> & Mordechai Choder<sup>7, #</sup>

9 <sup>1</sup>*Computer Science Division, University of California, Berkeley, California 94720, USA.*

10 <sup>2</sup>*Department of Statistics, University of California, Berkeley, California 94720, USA.*

11 <sup>3</sup>*Chan Zuckerberg BioHub, San Francisco, California 94158, USA.*

12 <sup>4</sup>*Department of Electrical Engineering and Computer Sciences, University of California,  
13 Berkeley, California 94720, USA.*

14 <sup>5</sup>*Ragon Institute of MGH, MIT, and Harvard, Cambridge, Massachusetts 02139, USA.*

15 <sup>6</sup>*Department of Genetics, Harvard Medical School, Boston, Massachusetts 02115, USA.*

16 <sup>7</sup>*Department of Molecular Microbiology, Rappaport Faculty of Medicine, Technion-Israel  
17 Institute of Technology, Haifa 31096, Israel.*

18 August 19, 2019

---

#Contact: [choder@technion.ac.il](mailto:choder@technion.ac.il)

## Abstract

mRNA levels are determined by the balance between mRNA synthesis and decay. Factors that mediate both processes, including the 5' to 3' exonuclease Xrn1, are responsible for the cross talk between the two processes in a manner that buffers steady-state mRNA levels. However, these proteins' roles in transcription remain elusive and controversial. Applying NET-seq to yeast cells, we show that Xrn1 functions mainly as a transcriptional activator and that its disruption manifests via the reduction of RNA polymerase II (Pol II) occupancy downstream of transcription start sites. We combine our data and novel mathematical modeling of transcription to suggest that transcription initiation and elongation of targeted genes is modulated by Xrn1. Furthermore, Pol II occupancy markedly increases near cleavage and polyadenylation sites in *xrn1* $\Delta$  cells while its activity decreases, a characteristic feature of backtracked Pol II. We also provide indirect evidence that Xrn1 is involved in transcription termination downstream of polyadenylation sites. Two additional decay factors, Dhh1 and Lsm1, seem to function similarly to Xrn1 in transcription, perhaps as a complex, while the decay factors Ccr4 and Rpb4 also perturb transcription in other ways. Interestingly, DFs are capable of differentiating between SAGA- and TFIID-dominated promoters. These two classes of genes respond differently to *XRN1* deletion in mRNA synthesis and differentially utilize mRNA decay pathways, raising the possibility that one distinction between the two types of genes lies in the mechanism(s) that balance these processes.

## Introduction

Steady-state mRNA levels are determined by the balance between synthesis and decay rates. Once thought to function separately, recent studies have discovered that these two processes are linked. In previous work we showed that the major cytoplasmic yeast mRNA degradation pathway, consisting of the decapping enzyme Dcp1/2, the decapping activator Pat1/Lsm1-7, the helicase Dhh1, and the 5'-3' exonuclease Xrn1, shuttles between the cytoplasm and the nucleus to participate in both processes. Notably, the elements of this pathway were found to degrade most mRNAs in the cytoplasm while stimulating transcription in the nucleus. The proteins Dcp2, Lsm1, and Xrn1 were further shown to bind chromatin, probably as a complex, and to stimulate transcription initiation and elongation (Haimovich et al. 2013). We also uncovered a connection between how Xrn1 functions in transcription and mRNA decay by revealing the

49 correlation between the effects of Xrn1 disruption on mRNA synthesis and decay in the nucleus and  
50 cytoplasm, respectively (Haimovich et al. 2013; Medina et al. 2014). We subsequently ranked genes  
51 according to their responsiveness to Xrn1 disruption in optimally proliferating yeast cells; the most  
52 responsive were dubbed the “Xrn1 synthegradon” and consisted of genes whose transcription and  
53 decay rates exhibited the highest sensitivity to Xrn1 disruption (Medina et al. 2014). This group  
54 is highly enriched with genes required for cell growth and proliferation, including genes encoding  
55 ribosome biogenesis and translation factors.

56 “Classical” mRNA decay factors are not the only bridges between transcription and mRNA  
57 decay. For example, Rpb4 and Rpb7, two canonical RNA polymerase II (Pol II) subunits, function  
58 in both processes (Choder 2004; Goler-Baron et al. 2008; Lotan et al. 2005; Lotan et al. 2007;  
59 Schulz et al. 2014; Shalem et al. 2011), and even promoters are capable of regulating mRNA decay  
60 (Bregman et al. 2011; Trcek et al. 2011). Hence the cross talk between mRNA synthesis and decay  
61 is complex and involves an interplay between canonical transcription and degradation factors.  
62 Although the links are clear, the mechanism mediating mRNA buffering remains enigmatic and  
63 controversial. Some publications have proposed a simple feedback mechanism involving a repressor  
64 (Sun et al. 2012; Sun et al. 2013), though others have suggested that components of the mRNA  
65 decay machinery function directly in transcription (Haimovich et al. 2013; Medina et al. 2014).  
66 In fact, the former articles proposed that the deletion of Xrn1 leads to transcription activation  
67 whereas the latter group asserted the opposite.

68 The realization of the critical role of mRNA buffering requires changes in the approaches  
69 used to analyze transcription. In the past, mRNA levels were regarded as a good proxy for  
70 transcription, and prior studies have relied upon changes in these levels to infer alterations in  
71 transcription. As an example, earlier work classified genes as SAGA- or TFIID-dominated based  
72 on measured changes in mRNA levels after inactivation of central components of the SAGA  
73 (mainly Spt3) or TFIID (mainly Taf1) complexes (Basehoar et al. 2004; Huisinga and Pugh  
74 2004). However, it was recently reported that virtually all promoters recruit both the SAGA and  
75 TFIID complexes and recent transcriptional profiling experiments demonstrated that mutations  
76 in either complex result in widespread defective transcription (Baptista et al. 2017; Bonnet et al.  
77 2014; Warfield et al. 2017). Nonetheless, the disruption of most components of either complex

78 did not lead to decreases in the levels of most mRNAs due to feedback mechanisms that involve  
79 mRNA decay (Baptista et al. 2017; Bonnet et al. 2014; Warfield et al. 2017). It is now clear  
80 that mRNA levels are not simply determined by two unrelated processes of mRNA synthesis and  
81 decay; rather, each of these processes affects the other by a hitherto elusive mechanism.

82 Following transcription initiation, many metazoan genes undergo a regulatory step termed  
83 promoter-proximal pausing (reviewed recently in Chen et al. 2018 and Wissink et al. 2019).  
84 Specifically, after transcribing 30–120 nucleotides downstream of transcription start sites (TSS),  
85 Pol II pauses; its release into productive elongation requires the activity of specific factors, includ-  
86 ing TFIIS. Following its release, Pol II interacts with additional elongation factors that modulate  
87 its processivity. It was recently reported that the release of the mammalian Pol II from a paused  
88 state in the promoter-proximal region is a key step in the regulation of transcription, both gener-  
89 ally (Sheridan et al. 2019) and in response to environmental stress (Bartman et al. 2019; Sheridan  
90 et al. 2019). Interestingly, Pol II recruitment rate was proposed to have only a marginal impact  
91 on overall transcription rates (Bartman et al. 2019). Conversely, common wisdom posits that  
92 promoter-proximal pausing does not play a major role in budding yeast as it is less prominent  
93 than in metazoans (Adelman and Lis 2012). However, there is evidence that Pol II in *S. cerevisiae*  
94 accumulate downstream of TSS (Churchman and Weissman 2011), though this phenomenon and  
95 its contribution to transcriptional regulation has been little-studied. In contrast with the incon-  
96 clusive nature of 5' pausing, a conspicuous Pol II pausing event does occur at polyadenylation  
97 sites (PAS) (e.g., Mayer et al. 2017). It is plausible that this pausing is required to provide the  
98 necessary time for the assembly of polyadenylation (PA) machinery, but gaps in the mechanis-  
99 tic understanding of this pausing event persist. Nevertheless, it is clear that factors of the PA  
100 pathway affect transcription termination events that occur downstream.

101 To probe the effects of mRNA decay factors (DFs) on transcription, we employed Native  
102 Elongating Transcript sequencing (NET-seq), an experimental protocol which assays Pol II occu-  
103 pancy at single nucleotide resolution. This technique sequences nascent RNA strands attached to  
104 actively engaged Pol II (Churchman and Weissman 2012) and maps the 3' ends of nascent RNAs  
105 to yield the positions of Pol II active sites. Therefore, unlike RNA-seq, NET-seq data are not  
106 confounded by mRNA decay rates and give the precise locations of bound Pol II. Additionally,

107 non-coding RNAs (ncRNAs) are frequently difficult to detect using RNA-seq because of their low  
108 transcript stabilities, but are easily identified using NET-seq, permitting more thorough investi-  
109 gations of additional classes of transcripts. In contrast to other transcription profiling methods  
110 such as Genomic Run-On (GRO) (García-Martínez et al. 2004) and its high-resolution cousin  
111 Biotin Genomic Run-On (BioGRO) (Jordán-Pla et al. 2014; Jordán-Pla et al. 2016), which assay  
112 only actively elongating Pol II, NET-seq can report both elongating Pol II as well as arrested Pol  
113 II (Churchman and Weissman 2011). As a result, run-on methods and NET-seq are particularly  
114 informative when used in combination and can reveal information about Pol II processivity and  
115 pausing.

116 In light of the poorly understood mechanisms linking mRNA synthesis and decay, we applied  
117 NET-seq to obtain Pol II occupancy profiles in various DF deletion strains to facilitate study of  
118 the roles of DFs in transcription. In addition to effects on initiation, Xrn1 and our other studied  
119 DFs seem to affect transcription primarily via elongation changes which are plausibly attributable  
120 to modified Pol II pausing and backtracking. These effects primarily manifest in the ends of genes,  
121 occurring ~100 bp downstream of TSS in the 5' end and extending from PAS roughly 75 bp into  
122 the 3' ends of gene bodies. Similar changes in Pol II occupancy were identified in the 5', but not  
123 3', ends of ncRNAs, implicating DFs in the regulation of the early stages of ncRNA transcrip-  
124 tion. Furthermore, deletion of *XRN1* affected Pol II elongation efficiency in a manner consistent  
125 with enhanced Pol II backtracking. We additionally employed a recently developed mathematical  
126 model (Erdmann-Pham et al. 2018) to infer changes in spatial transcriptional dynamics. This  
127 methodologically novel model uses our metagene profiles to estimate baseline values for relative  
128 initiation and elongation rates while offering a framework to systematically vary unknown pa-  
129 rameters. This allowed us to perform *in silico* experiments suggesting that Xrn1 is required for  
130 efficient initiation of its target genes. In contrast to the most affected genes, NET-seq signals  
131 increase in response to Xrn1 disruption in a small repertoire of so-called “repressed” genes. In-  
132 terestingly, these genes displayed demonstrably different 5' and 3' occupancy patterns upon DF  
133 deletion. Given these observed differences and comparisons with external data, we propose that  
134 the considered DFs modulate transcription of a subset of genes, perhaps as a complex, mainly  
135 via the regulation of pausing and backtracking during the early and late stages of transcription.

## 136 Results

### 137 Deletions of mRNA decay factors lead to overall decreases in Pol II occupancy

138 Previously we reported that Xrn1 binds to promoters and gene bodies and directly stimulates  
139 transcription initiation and elongation (Haimovich et al. 2013). Shortly thereafter, Sun et al.  
140 reported that the deletion of *XRN1* leads to the upregulation of transcription, implying that  
141 Xrn1 represses transcription (Sun et al. 2013). To resolve this discrepancy and gain insight into  
142 the mechanisms linking transcription and mRNA decay, we used NET-seq to compare Pol II  
143 occupancy in wild type (WT) strains and those carrying a deletion of *XRN1* (*xrn1Δ*). Overall  
144 Pol II occupancy in *xrn1Δ* cells generally decreased (Fig. 1A), indicating the downregulation  
145 of transcription. Moreover, the fold change distribution had a heavier negative than positive  
146 tail, highlighting that a subset of genes was affected more than others. Our results indicate  
147 that Pol II occupancy is negatively affected by *XRN1* deletion, consistent with its proposed role  
148 as a transcriptional activator (Haimovich et al. 2013; Medina et al. 2014). We further studied  
149 additional mutant strains, each carrying a deletion of either *CCR4*, *DHH1*, or *LSM1*, and  
150 observed decreases in Pol II occupancy in each respective knockout, although not as strongly as  
151 those found in *xrn1Δ* cells (Fig. S1A). These results support roles for the encoded proteins as  
152 transcriptional stimulators.

153 In earlier work, we found that Xrn1, Lsm1, and Dcp2 produced highly similar ChIP-exo  
154 profiles (Haimovich et al. 2013), raising the possibility that they function in transcription as a  
155 complex. To examine potential complex associations among DFs, we sought to characterize the  
156 extent to which deletion strains induced similar genome-wide transcriptional responses. We con-  
157 structed a correlation matrix of gene Pol II fold changes (Fig. 1B), uncovering strong similarities  
158 in transcriptomic response to deleted DFs. As an external control, we further examined the  
159 correlations between our NET-seq data and previously generated NET-seq profiles from strains  
160 carrying respective deletions of *EAF3*, *RCO1*, and *SET2*, genes encoding a set of proteins which  
161 are known to act in concert and are required for proper function of the Rpd3S H4 deacetyla-  
162 tion complex (Churchman and Weissman 2011). Strains carrying deletions in each of *DST1* and  
163 *SET1*, encoding proteins that regulate Pol II release from backtracking and promoter direction-

**A** Distribution of FCs across genes, *xrn1* $\Delta$

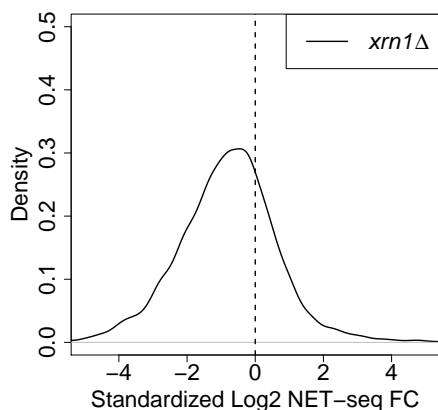

**B** Correlations of FCs in different KO strains

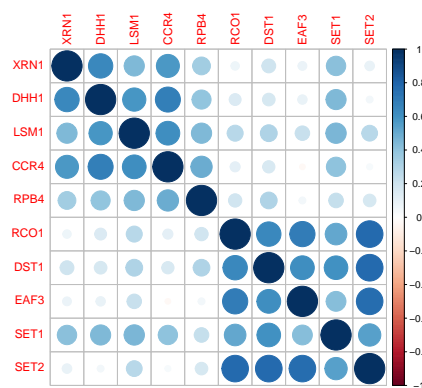

**C** Comparison of FCs with prior measurements of sensitivity to *XRN1* deletion

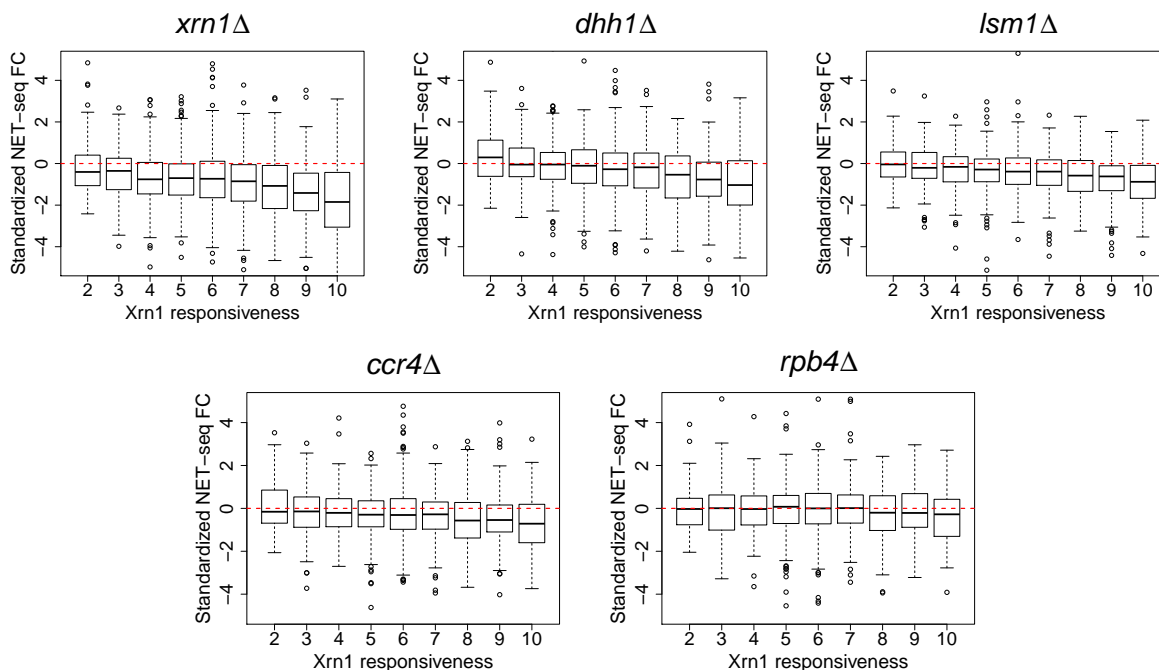

**Fig. 1** Fold changes in NET-seq Pol II occupancy.

(A) NET-seq reads were aggregated within annotated gene boundaries (TSS to PAS) and applied DESeq2 (Love et al. 2014) to estimate standardized fold changes in each gene's normalized signal with respect to the WT. Both *xrn1* $\Delta$  and WT were done in two replicates. (B) The visualized correlation matrix for standardized fold changes in NET-seq reads in genes. Each entry corresponds to the Spearman correlation between the fold change with respect to the wild type in NET-seq reads in annotated genes. *xrn1* $\Delta$ , *dhh1* $\Delta$ , *lsm1* $\Delta$ , *ccr4* $\Delta$ , and *rpb4* $\Delta$  come from the experiments associated with this paper whereas the rest come from (Churchman and Weissman 2011). Fold changes were estimated using DESeq2 (Love et al. 2014) with both experiments analyzed simultaneously. **C**: Genes were stratified using previously obtained measures of Xrn1 responsiveness, an aggregated measure of the sensitivity of synthesis and decay rates to Xrn1 deletion as measured in (Medina et al. 2014). A value of 2 indicates the lowest sensitivity and 10 the highest. Standardized NET-seq fold changes from our experiments were then plotted for genes falling into each responsiveness classification.

164 ality (Churchman and Weissman 2011), were also included. Fold changes among these non-DF  
165 strains correlated well ( $\rho \sim 0.75 - 0.8$ ) as expected due to their shared functions. In contrast,  
166 correlations between these non-DFs and our studied DFs were typically much lower (Fig. 1B),  
167 though this may be in part because they were collected in a different experiment. Nonetheless,  
168 the strong correlations among DF mutants suggest that they may act together in a complex as has  
169 been proposed for Lsm1 and Xrn1 (Haimovich et al. 2013). Rpb4 is a protein that functions in  
170 both mRNA synthesis and decay (Choder 2004; Duek et al. 2018; Lotan et al. 2005). To examine  
171 whether Rpb4 function is indeed related to those of our studied DFs, we performed NET-seq on  
172 an *rpb4* $\Delta$  strain and compared it to our other samples. As suspected, the *rpb4* $\Delta$  NET-seq profile  
173 correlated well with all considered DFs ( $\rho \sim 0.5$ ), attaining its highest correlation with *dhh1* $\Delta$   
174 (Fig. 1B). Interestingly, *rpb4* $\Delta$  NET-seq data correlated better with the studied DF KOs than  
175 with KOs of factors that function in transcription, e.g. *dst1* $\Delta$  (Fig. 1B). This pattern of correla-  
176 tions suggests that Rpb4 functions similarly to the studied DFs in linking mRNA synthesis and  
177 decay, consistent with its known interactions with both Pol II (Choder 2004) and the scaffold of  
178 the mRNA decay complex, Pat1 (Lotan et al. 2005), as well as its distinct function in transcrip-  
179 tion and in the major cytoplasmic mRNA decay pathway (Duek et al. 2018; Goler-Baron et al.  
180 2008; Lotan et al. 2005; Lotan et al. 2007; Shalem et al. 2011). We therefore included the *rpb4* $\Delta$   
181 strain in our subsequent analyses.

182 To compare results obtained via NET-seq to other RNA quantification methods, we reviewed  
183 publicly available data for knockouts which were considered in our experiment. We obtained  
184 RNA-seq fold changes for both *dhh1* $\Delta$  and *lsm1* $\Delta$  and GRO data for *rpb4* $\Delta$  and *xrn1* $\Delta$  (He et  
185 al. 2018; García-Martínez et al. 2015; Gutiérrez et al. 2017; Haimovich et al. 2013). Comparisons  
186 of NET-seq, RNA-seq, and GRO data convincingly demonstrated that reads correlated much  
187 more strongly by protocol than by condition for both raw reads (not shown) and fold changes  
188 (Fig. S2). This highlights the fact that each protocol reports different aspects of gene expression;  
189 for example, whereas NET-seq reports Pol II occupancy, GRO reports Pol II elongation activity,  
190 and RNA-seq captures steady-state RNA levels. The low correlations of fold changes among  
191 different quantification methods further demonstrates the importance of the cross talk between  
192 mRNA synthesis and decay.



193 To examine whether Xrn1 or Rpb4 are required for the overall processivity of Pol II, we  
194 compared NET-seq signals with previously reported GRO signals (García-Martínez et al. 2015;  
195 Haimovich et al. 2013). GRO results are sensitive to backtracking because the RNA 3' end of  
196 backtracked Pol II is displaced from the active site and transcription elongation cannot proceed *in*  
197 *vitro*. The log<sub>2</sub> ratio between GRO signal and Pol II occupancy detected by NET-seq (henceforth  
198 the elongation efficiency) is substantially compromised in the *xrn1*Δ strain (Fig. S1B), indicating  
199 that Xrn1 helps prevent or resolve backtracking, thus mediating proper elongation of Pol II.  
200 Correspondingly, we consistently found no correlation between NET-seq and GRO data (Fig. S2).  
201 In comparison to *xrn1*Δ, the *rpb4*Δ strain displayed a smaller decrease in efficiency, so it may  
202 not be as important as Xrn1 in the prevention or resolution of backtracking across the genome.  
203 However, as we show later, Rpb4 does impact Pol II activity in the 5' and 3' ends of genes. To  
204 further probe the impact of Xrn1 and Rpb4 on elongation, we compared fold changes in elongation  
205 efficiency to gene length. Consistent with the above, fold changes in *xrn1*Δ were more negative  
206 than those in *rpb4*Δ for genes of all lengths, but both deletion strains showed that longer genes  
207 tended to see larger reductions in elongation efficiency (Fig. S3). These findings suggest Xrn1 and,  
208 to a lesser extent, Rpb4 are important for efficient Pol II elongation in a manner which becomes  
209 more essential for longer genes (Medina et al. 2014; Verma-Gaur et al. 2008). Importantly, we  
210 do not suggest that Rpb4 is not important for transcription, as was demonstrated previously by  
211 other means (see Introduction); rather, we conclude that the overall effects of *RPB4* deletion  
212 identified using GRO are similarly reflected in the NET-seq data.

213 We previously rated genes according to the sensitivity of their mRNA synthesis and decay  
214 rates to *XRN1* deletion. mRNAs whose synthesis and decay were highly responsive to Xrn1  
215 disruption were named the “Xrn1 synthegradon”, while those least affected were dubbed the  
216 “Xrn1 anti-synthegradon” (Medina et al. 2014). We compared the changes in NET-seq signals  
217 as a function of these ratings, finding that higher sensitivity is strongly correlated with larger  
218 decreases in Pol II occupancy in *xrn1*Δ, *dhh1*Δ, and *lsm1*Δ; a weaker pattern was apparent  
219 for *ccr4*Δ and none for *rpb4*Δ (Fig. 1C). Our findings directly support earlier classification of  
220 genes into the Xrn1 synthegradon using GRO (Medina et al. 2014) and additionally demonstrate  
221 that transcription of the same genes is also activated by Dhh1, Lsm1, and Ccr4. Rpb4's role in

222 transcription is unrelated to this classification, most likely because it affects the transcription of  
223 most, if not all, genes (Schulz et al. 2014).

224 To understand whether particular classes of genes are more affected by DF deletions, we  
225 ranked genes according to their fold changes in total Pol II occupancies. Genes whose Pol II  
226 counts decreased or increased significantly were called “up-regulated” (normally their transcrip-  
227 tion is induced by the concerned DFs) or “downregulated” genes (normally their transcription is  
228 repressed by the concerned DFs), respectively. Briefly, we found that the most affected genes in  
229 *xrn1*Δ strains are those which are required for cell proliferation under optimal conditions when  
230 glycolysis is the main producer of ATP (and aerobic metabolism is partially repressed). For ex-  
231 ample, deletion of *XRN1* results in reduced transcription of ribosomal protein (RP), ribosome  
232 biogenesis (RiBi), and transcription factor (TF) genes (Fig. S4A) and increased transcription of  
233 aerobic metabolic genes (cellular respiration, mitochondria, ATP synthesis and transport, and  
234 cytochromes) (Fig. S4B). Highly similar classes of affected genes were identified among *Dhh1*-  
235 upregulated genes in *dhh1*Δ (results not shown). Since the deletion of *XRN1* results in lower Pol  
236 II levels in RP and RiBi genes but increased levels in aerobic metabolic genes, it seems that *Xrn1*  
237 is involved in the balance between building cell mass and the metabolism. Interestingly, *Xrn1* is  
238 regulated by Snf1-activated phosphorylation (Braun and Young 2014) and *XRN1* interacts ge-  
239 netically with *TOR2* (Costanzo et al. 2016). Snf1 and Tor2 are kinases that function in a similar  
240 balance between building cell mass and metabolism.

## 241 **Deletions of mRNA decay factors affect Pol II occupancy in both ends of tran-** 242 **scription units of protein coding genes**

243 A notable feature of NET-seq is that it can capture arrested Pol II in addition to those which  
244 are productively elongating. While this may complicate direct estimation of transcription rates,  
245 it allows for a more refined interrogation of changes in Pol II processivity. For instance, the role  
246 of the elongation factor TFIIS (*Dst1*) in facilitating the release of backtracked Pol II was studied  
247 using NET-seq (Churchman and Weissman 2011). In the same vein, we examined whether our  
248 deleted genes affect Pol II distributions across genes by constructing metagene densities (see  
249 Methods). We first observed that WT samples displayed a ramp-like accumulation of reads ~100

250 bp downstream of transcription start sites (TSS), in agreement with previous results (Churchman  
251 and Weissman 2011). Remarkably, TSS-proximal densities decreased strongly in *xrn1* $\Delta$  and  
252 *dhh1* $\Delta$ . In contrast, *ccr4* $\Delta$  and *rpb4* $\Delta$  exhibited even sharper Pol II occupancy profiles in these  
253 regions which also resided closer to TSS than those present in WT samples (Fig. 2). Pol II  
254 additionally pauses at the sites where Pol II transcripts are cleaved and post-transcriptionally  
255 polyadenylated, henceforth denoted polyadenylation sites (PAS) (Bentley 2014; Hyman and Moore  
256 1993; Kazerouninia et al. 2010; Kuehner et al. 2011; Larson et al. 2011; Mischo and Proudfoot  
257 2013). We observed a trend of higher densities near PAS across all mutants, with a particularly  
258 pronounced increase in *xrn1* $\Delta$  and *dhh1* $\Delta$  and smaller changes apparent in the remaining mutants  
259 (Fig. 2). Together, these results indicate that deletions of *XRN1* and other DFs contribute to  
260 the high Pol II occupancy  $\sim$ 100 bp downstream of TSS. We note that the 5' and 3' changes in  
261 Pol II occupancy are seemingly unrelated to growth rate given the lack of correlation between  
262 these changes (Fig. 2) and growth rates (Fig. S5). For example, both *xrn1* $\Delta$  and *rpb4* $\Delta$  cells  
263 grow more slowly than WT but display quite different metagenes. Likewise, *lsm1* $\Delta$ , *dhh1* $\Delta$ , and  
264 *ccr4* $\Delta$  grow similarly but present notably distinct average Pol II profiles. Conversely, *ccr4* $\Delta$  and  
265 *rpb4* $\Delta$  cells grow at different rates, yet possess similar metagenes.

## 266 **Pol II initiation and elongation at the 5' ends**

267 Given the locations of the most apparent changes, we focused on the respective ends of tran-  
268 scription units, beginning with the 5' end. To achieve finer resolution in this region, we generated  
269 metagene profiles for reads adjacent to TSS (Figs. 3A and S6). Consistent with our prior metagene  
270 analysis, we observed disruptions in normal promoter-proximal accumulation of NET-seq reads  
271 in *xrn1* $\Delta$  as well as *dhh1* $\Delta$  and *lsm1* $\Delta$  strains (Figs. 3A, S6A, S6B). Based on mathematical  
272 modeling (see below), we interpret these results to mean that the deletion of any one of these  
273 mRNA decay factors results in defective transcription initiation in addition to previous findings  
274 that *XRN1* deletion leads to defective elongation (Haimovich et al. 2013; Begley et al. 2019). In  
275 contrast, deletions of *CCR4* and *RPB4* resulted in sharper Pol II peaks. In these two strains,  
276 Pol II occupancy was slightly closer to TSS than in the WT (Figs. S6C, S6D).

277 We computed additional Pol II metagenes after stratifying genes into those which were up-

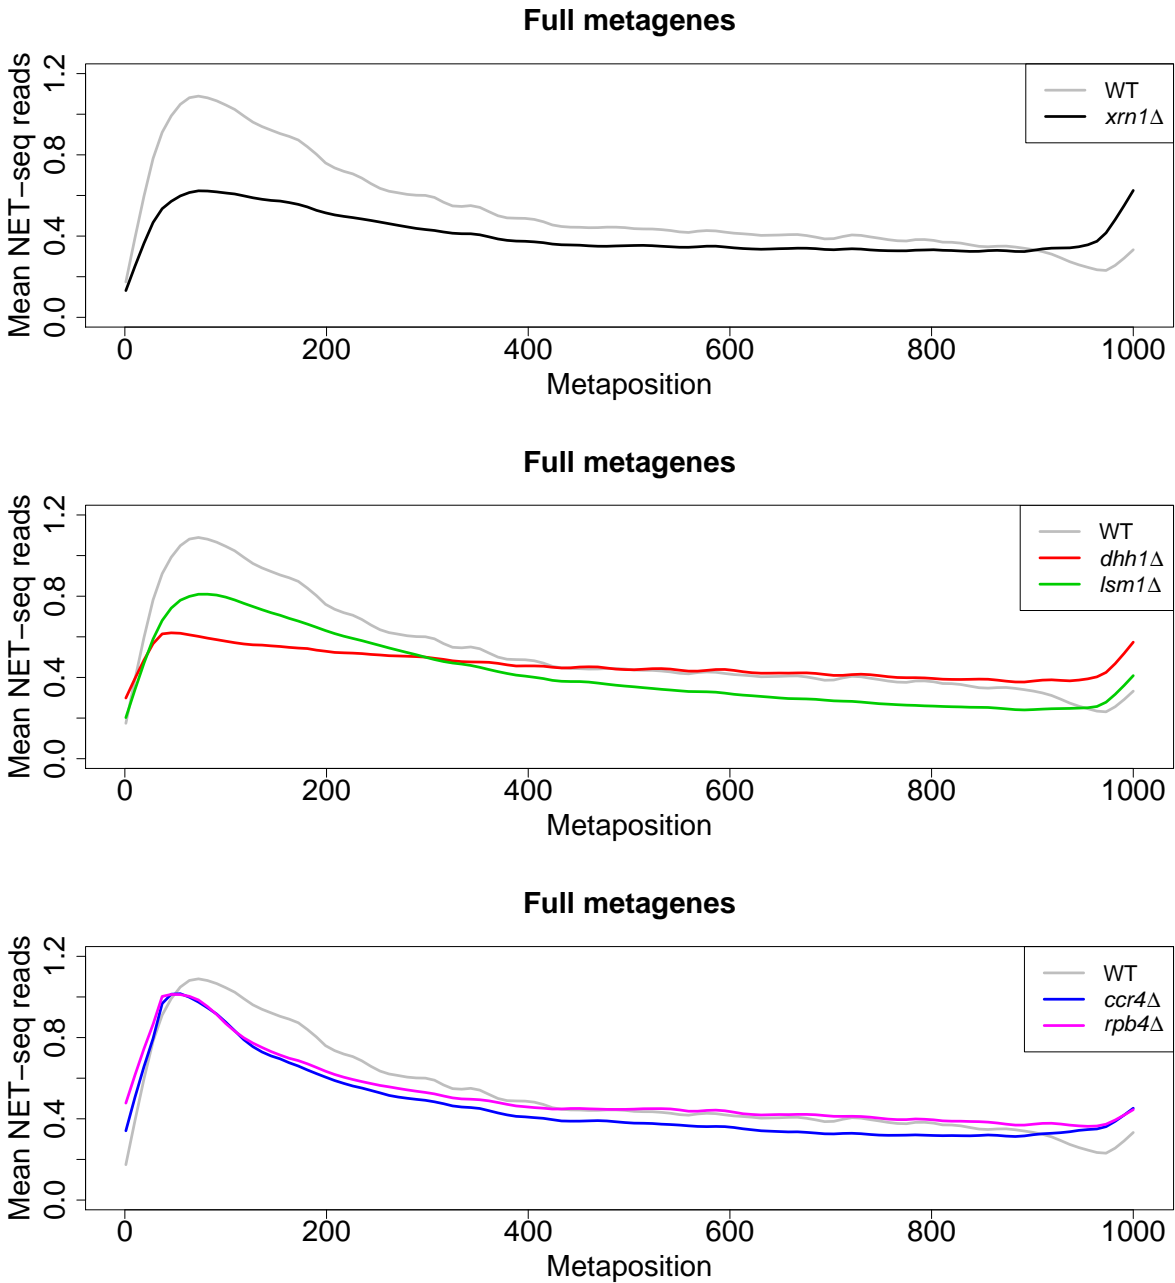

**Fig. 2 Comparison of normalized full-body metagenes.** Normalized reads were aggregated within between the TSS and PAS. Genes were then re-scaled to each be of length 1000nt. Finally, the read counts corresponding to the new “metapositions” were averaged to yield a picture of Pol II occupancy along whole gene bodies. Different panels show comparisons between WT and the indicated deletion strains.

278 or downregulated by Xrn1, finding that these two classes of genes responded fundamentally dif-  
279 ferently to the deletion of *XRN1* (Fig. 3A). In genes strongly upregulated by Xrn1 ( $FC < -2$ ),  
280 5' Pol II occupancy underwent a notable reduction in *xrn1* $\Delta$  strains. Differences between these  
281 gene classes were also apparent in WT cells; genes upregulated by Xrn1 are highly transcribed  
282 and exhibited relatively higher Pol II levels with steeper slopes in 5' regions. In contrast, those  
283 which are downregulated did not (Fig. 3A), suggesting that Xrn1 deletion differentially affects  
284 genes based on their normal transcriptional patterns. One potential caveat is that the genes  
285 upregulated by Xrn1 have roughly three times as many reads as those it downregulated, so the  
286 observed differences may be related to the extent of transcription. Nevertheless, it is interesting  
287 that the presence of Xrn1 stimulates highly transcribed genes and represses lowly transcribed  
288 genes, helping maintain the gap in transcription levels. Consequently, upon disruption of Xrn1,  
289 we expect the genome-wide spread of transcription rates to shrink. Up- and downregulated genes  
290 were subsequently determined for the other deletion strains using the same criteria (Fig. S6). The  
291 resulting profiles from *lsm1* $\Delta$  and *dhh1* $\Delta$  cells were very similar to those of *xrn1* $\Delta$ , suggesting  
292 that Xrn1, Lsm1 and Dhh1 function similarly (Figs. 3A, S6A, S6B). On the other hand, changes  
293 in *ccr4* $\Delta$  and *rpb4* $\Delta$  profiles exhibited different patterns (Figs. S6C, S6D). upregulated genes  
294 displayed reductions in both mutants whereas 5' peaks in downregulated genes increased and ex-  
295 ceeded levels in the WT. We further computed Pol II metagenes upon restriction to specific classes  
296 of genes. Two examples were genes annotated to the ribosome biogenesis (RiBi) and ribosomal  
297 protein (RP) ontologies, which we selected due to their high expression levels and the reported  
298 effect of Xrn1 on their expression (Medina et al. 2014). TSS metagenes showed reductions in Pol  
299 II in both classes, although RP genes displayed heightened and/or sharper Pol II distributions in  
300 *ccr4* $\Delta$ , *dhh1* $\Delta$ , and *rpb4* $\Delta$  (Figs. S8A, S9A).

301 We sought to bolster our hypothesis of reduced elongation rates in *xrn1* $\Delta$  by looking for  
302 signs of increased pausing or backtracking. As backtracked Pol II cannot elongate because the  
303 nascent RNA is displaced from the active site (Churchman and Weissman 2011), they can be  
304 detected by NET-seq but not GRO because the latter assay relies on transcription elongation.  
305 Consequently, backtracking rates can be evaluated by comparing data from these two assays. To  
306 investigate transcriptional activity per unit Pol II - the elongation efficiency - in WT and *xrn1* $\Delta$

307 strains, we compared BioGRO data (Jordán-Pla et al. 2014; Jordán-Pla et al. 2016) and our  
308 NET-seq data. This is analogous to the analysis in Fig. S1B but with spatial resolution of Pol  
309 II activity. We focused on the two regions that demonstrated strong responses to Xrn1 deletion  
310 - the 5' and 3' ends, the latter of which is discussed in the subsequent section. In WT cells, we  
311 observed high elongation efficiency extending from TSS until  $\sim 30$  bp post-TSS, followed by a  
312 gradual decrease until  $\sim 100$  bp post-TSS (Fig. 3B). We thus propose that WT Pol II backtracks  
313 and pauses more often as it approaches  $\sim 100$  bp past-TSS. In cells lacking Xrn1, this initial high  
314 elongation efficiency region vanishes, suggesting dysregulation of these processes (Fig. 3B).

315 The accumulation of NET-seq reads at  $\sim 100$  bp downstream of TSS could represent a con-  
316 trolled Pol II pausing phenomenon akin to what has been described for many metazoan genes  
317 (see Introduction). Alternatively, the trademark buildup of Pol II near TSS may simply be the  
318 result of unbalanced initiation and 5' elongation rates. To investigate the plausibility of the latter  
319 scenario, we employed a recently developed mathematical model which considers particles moving  
320 along a 1-dimensional path that was recently applied to ribosomes (Erdmann-Pham et al. 2018).  
321 We first used our computed metagene profiles to estimate reference initiation and site-specific  
322 elongation rates and then examined the results of perturbing these parameters. This allowed us  
323 to perform *in silico* experiments to separate the contributions of initiation and elongation rate  
324 changes and to infer the contributions of the studied DFs to elongation dynamics. Although  
325 Monte Carlo models of transcription have been considered in a handful of prior studies (Darzacq  
326 et al. 2007; Ehrensberger et al. 2013; Grosso et al. 2012; Jonkers et al. 2014; Le Martelot et al.  
327 2012), to the best of our knowledge this is the first attempt to apply a model which rigorously  
328 and flexibly handles both spatial heterogeneity in elongation rates and the mutual interference of  
329 co-localized Pol II. Furthermore, it permits us to obtain analytical solutions from input param-  
330 eters, increasing the precision of our analysis. Based on this model, we found that the observed  
331 WT Pol II metagene was indeed consistent with slower 5' elongation compared to initiation (Fig.  
332 3C). Thus, a controlled pausing event is not necessary to reproduce the observed profiles. Of  
333 course, our simulation does not conclusively rule out such a possibility; nevertheless, given the  
334 absence of supporting data in this work or the wider literature, we propose that imbalanced  
335 rates of transcription initiation and elongation constitute the major cause of 5' Pol II accumu-

## A Normalized NET-seq Pol II metagenes in *xrn1* $\Delta$

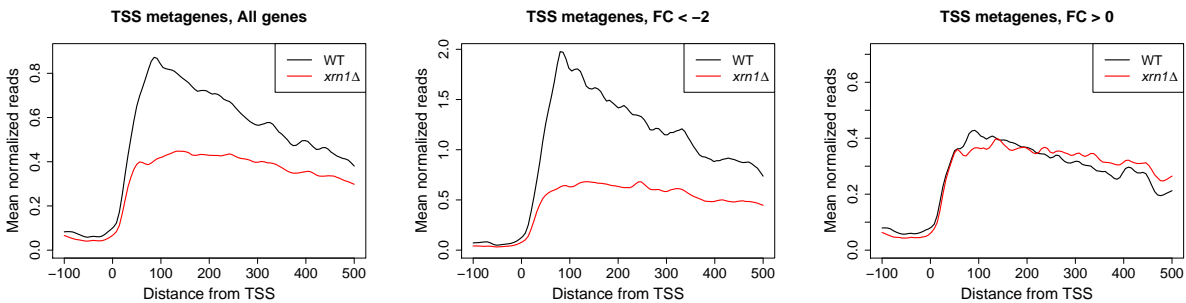

## B Elongation efficiency metagenes ( $\log_2$ BioGRO/NET-seq ratio)

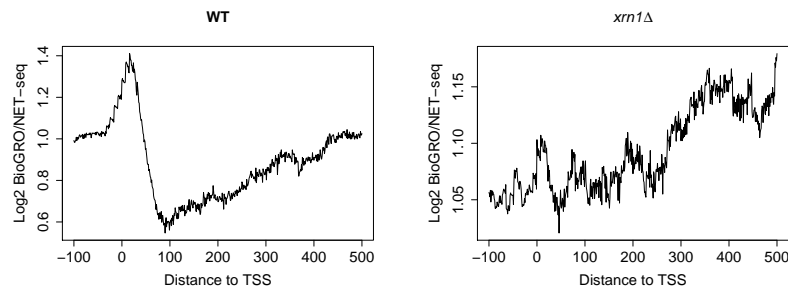

## C Pol II metagenes with predicted values based on mathematical modeling

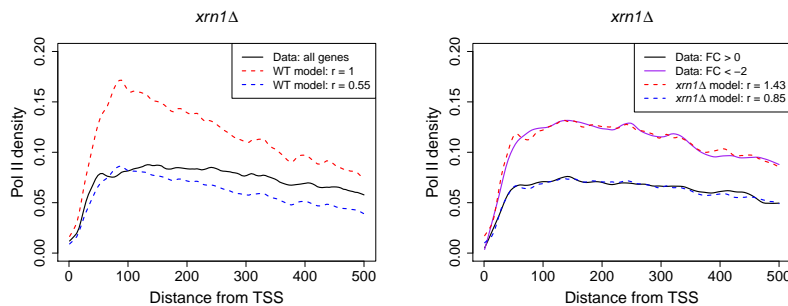

**Fig. 3 Metagene profiles near TSS in WT and *xrn1* $\Delta$  for Pol II and BioGRO/NET-seq ratios.** (A) NET-seq reads were extracted (-100:500 relative to TSS), normalized, and averaged. Genes were separated into those which are stimulated ( $FC < -2$ ) or repressed by Xrn1 ( $FC > 0$ ). (B) We extracted BioGRO and NET-seq values in the -100:500 region with respect to the TSS for all genes. For each gene, we smoothed the BioGRO and NET-seq profiles and took the  $\log_2$  of their ratios. We then averaged over all genes to yield elongation efficiency metagenes. (C) We applied a mathematical model (see Methods) to investigate how initiation and elongation rates affect metagenes. Elongation rates for WT and mutant metagenes were estimated and initiation rates (“ $r$ ”) were varied to find the best fits. L - Varying initiation rates while using only the estimated WT elongation rates; R - varying initiation rates while using the estimated elongation rates from the *xrn1* $\Delta$  metagene. See Fig. S6 for other mutants.

336 lation in WT cells. Given the computed transcription elongation efficiency profiles (Fig. 3B),  
337 we additionally propose that the gradual decrease in Pol II processivity as Pol II approaches the  
338 100 bp position exacerbates the imbalance between rates of initiation and elongation. Thus, the  
339 characteristic peak at  $\sim 100$  bp seems to result from the balance between initiation rates and  
340 position-dependent kinetics of Pol II elongation.

341 We next performed a similar analysis on mutant metagenes. To test whether the changes  
342 between mutant and WT profiles could be replicated by solely modulating initiation, we fixed  
343 elongation rates to the values inferred for the WT (see Methods) and varied initiation rates over  
344 a range of values in the simulation model. This procedure produced similar simulated profiles to  
345 those observed for *xrn1* $\Delta$  and *lsm1* $\Delta$ , suggesting that the deletion of these genes compromised  
346 transcription initiation. However, the observed NET-seq profiles were notably flatter than the  
347 simulated ones (Figs. 3C, S6B), indicating that defects in elongation in the mutants should also be  
348 considered. For the *ccr4* $\Delta$ , *rpb4* $\Delta$ , and *dhh1* $\Delta$  mutants, simulated profiles using WT elongation  
349 rates were unable to recapitulate the appearance of pronounced peaks slightly upstream of 100  
350 bp (Figs. S6A, S6C, S6D). This indicates that, for these strains, our observed metagene profiles  
351 cannot be explained by simple changes in the overall balance between initiation and elongation.  
352 Hence it is likely that more complex kinetics are involved in which the  $\sim 100$  bp location may serve  
353 as a transition point. This notion is supported by the clear differences in behavior observed at the  
354 30 bp and 100 bp positions post-TSS in the WT and *xrn1* $\Delta$  elongation efficiency (BioGRO/NET-  
355 seq) profiles (Fig. 3B). In summary, while the differences between heights of 5' peaks in WT and  
356 mutant strains can be explained by reduced initiation rates, the differences in profile shapes cannot  
357 be totally accounted for by manipulating this single quantity. Hence transcription elongation is  
358 affected both before and after the 100 bp mark in *xrn1* $\Delta$  cells (Fig. 3). We therefore propose that  
359 initiation rate reduction is a major consequence of *XRN1* and *LSM1* deletion with additional  
360 decreases also occurring in elongation rates. Furthermore, although the respective deletions of  
361 *DHH1*, *CCR4*, and *RPB4* also reduce initiation rates, they have additional targeted effects on  
362 elongation rates in the first 100 bp of genes which differ from those of Xrn1 and Lsm1.



363 **Deletion of mRNA decay factors leads to a marked accumulation of Pol II near PAS,**  
364 **probably due to increased pausing/backtracking**

365 WT Pol II pauses at PAS (Fig. 4A), probably to provide time for the PA mechanism to function  
366 (Tian and Manley 2017). In the *xrn1* $\Delta$ , *dhh1* $\Delta$ , and *lsm1* $\Delta$  strains, abnormally high spikes were  
367 observed in this region (Figs. 4A, S7). This pattern suggests enhanced pausing in the absence  
368 of these DFs. Interestingly, mutant strains displayed abnormally high accumulations of reads  
369 beginning  $\sim$ 75 bp upstream of PAS and lasting until PAS. Downstream of these PAS, NET-seq  
370 reads accumulated due to transcription that continues beyond PAS before reaching transcription  
371 termination sites (Bentley 2014). Atypically low NET-seq reads were observed downstream of  
372 PAS in the *xrn1* $\Delta$  mutant strains, suggesting that less Pol II could be released from a paused  
373 state in the absence of Xrn1. In the *rpb4* $\Delta$  and *ccr4* $\Delta$  strains, we detected accumulations of reads  
374 upstream and downstream of PAS, but the actual PAS peaks were comparable to those in the WT  
375 (Fig. S7). Separation into genes up- and downregulated by Xrn1 revealed 3' occupancy patterns  
376 unlike those in 5' ends. Whereas upregulated genes ( $FC < -2$ ) had displayed large reductions in  
377 5' Pol II levels (Fig. 3A), 3' occupancy demonstrated relatively little sensitivity to the presence of  
378 Xrn1 (Fig. 4A). Genes downregulated by Xrn1 ( $FC > 0$ ) displayed nearly the opposite behavior,  
379 as 5' occupancy was insensitive to *XRN1* deletion while 3' pausing greatly increased (Figs. 3A,  
380 4A). Deletions of *CCR4* and *RPB4* had smaller effects on pausing at PAS, although general  
381 occupancy increases were present in downregulated genes (Fig. S7).

382 Our metagene analyses showed that *xrn1* $\Delta$  and *dhh1* $\Delta$  cells accumulate abnormally small  
383 numbers of reads in 5' regions and unusually high numbers of reads in 3' regions ( $\sim$ 100 until  
384 PAS). Because these analyses aggregated reads across all genes, it was unclear whether profile  
385 changes were driven by widespread behavior or simply a small number of highly impacted genes.  
386 Given that we observed somewhat similar 5' and 3' profiles in RiBi and RP genes (Figs. S8, S9) as  
387 well as SAGA and TFIID-dominated genes (Figs. S10, S11), we suspected that many genes were  
388 affected. To address this issue more directly, we determined Pol II 5'/3' ratios for each mutant,  
389 an approach which preserves the pairing of 5' and 3' occupancies in individual genes (Fig. S12).  
390 Indeed, Pol II 5'/3' ratios were substantially lower in *xrn1* $\Delta$  compared to WT strains, and the  
391 overall shift in the distribution of these ratios suggests that the changes in the 5' and 3' metagene

392 profiles are not confined to a small number of genes. Interestingly, the *dhh1* $\Delta$  strain exhibited a  
393 similar pattern of Pol II 5'/3' ratios, and additional modest decreases in Pol II 5'/3' ratios were  
394 observed in the remaining mutants.

395 Much like before, we generated BioGRO/NET-seq ratio profiles to consider the role of pausing  
396 and backtracking near PAS (Fig. 4B). We found that WT Pol II elongation efficiency gradually  
397 decreased as it moved towards PAS while *xrn1* $\Delta$  cells displayed a precipitous efficiency reduction  
398 at the PAS. Thus, Pol II that accumulate upstream of PAS in *xrn1* $\Delta$  cells are relatively inactive,  
399 both in WT but notably more so in *xrn1* $\Delta$  cells, most likely in a backtracked configuration. Col-  
400 lectively, the most pronounced effects of DFs in transcription are at the ends of genes where Pol II  
401 processivity decreases in the mutant strains, potentially relating to increased Pol II backtracking.  
402 Moreover, the differences between DF deletion-induced responses indicate additional defects in  
403 transcription initiation. These differences cannot be simply attributed to growth rates because  
404 *lsm1* $\Delta$  cells proliferate comparably to *dhh1* $\Delta$  and *ccr4* $\Delta$  (Fig. S5) despite different effects of the  
405 deletions of *LSM1*, *DHH1*, and *CCR4* on metagene profiles (Fig. S6).

#### 406 **Transcription termination (beyond PAS) seems to be affected by deletion of** 407 **the studied mRNA decay factors**

408 Transcription termination, which occurs downstream of PAS, is allosterically modulated by the  
409 PA mechanism (Richard and Manley 2009; Tian and Manley 2017). Because we found that  
410 our studied DFs function in the PA process, we examined whether transcription termination is  
411 also affected by the deletion of DFs. Direct analysis of changes in termination using NET-seq  
412 is challenging because it does not identify transcription termination efficiently, probably because  
413 there are multiple termination events (Churchman and Weissman 2012). Therefore, we examined  
414 the effect of DFs on this process indirectly by taking advantage of the capacity of ChIP-seq, or  
415 NET-seq in our case, to report Pol II pausing due to collisions of two convergently transcribed Pol  
416 II molecules (Hobson et al. 2012). After defining the midpoint between convergent genes as the  
417 halfway point between the ends of paired 3' UTRs, we found that the NET-seq signal in WT cells  
418 decreases gradually as a function of distance from the 3' ends, consistent with gradual termination  
419 post-PAS. In contrast, mutant strains displayed accumulations of Pol II near the midpoints of

## A Normalized NET-seq Pol II PAS metagenes in WT and *xrn1* $\Delta$

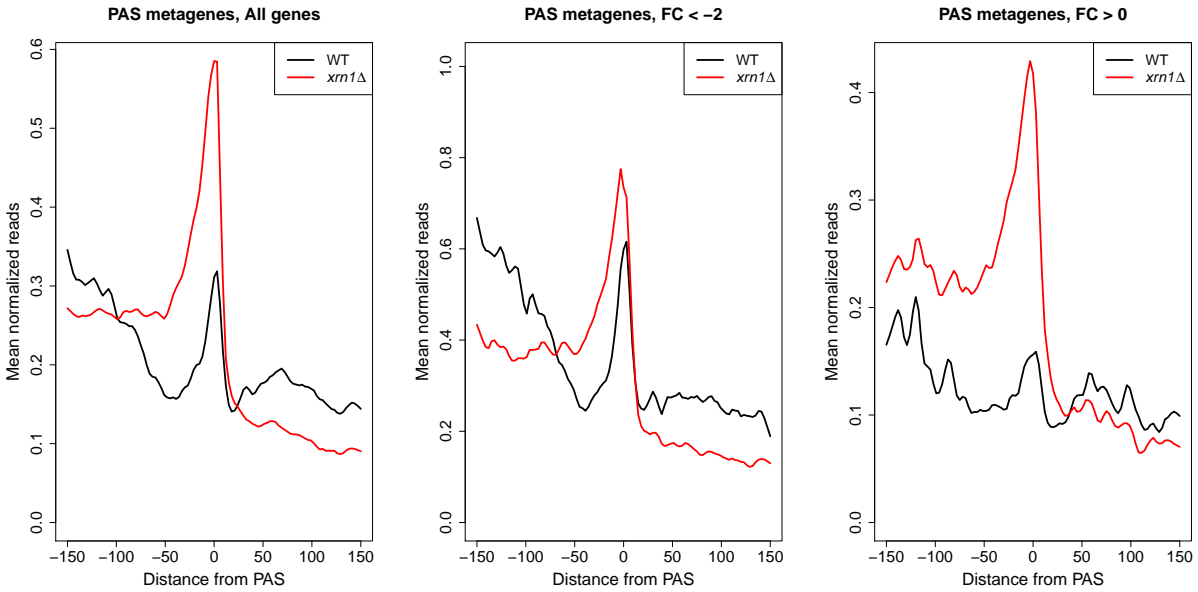

## B Elongation efficiency metagenes ( $\log_2$ BioGRO/NET-seq ratio) at PAS

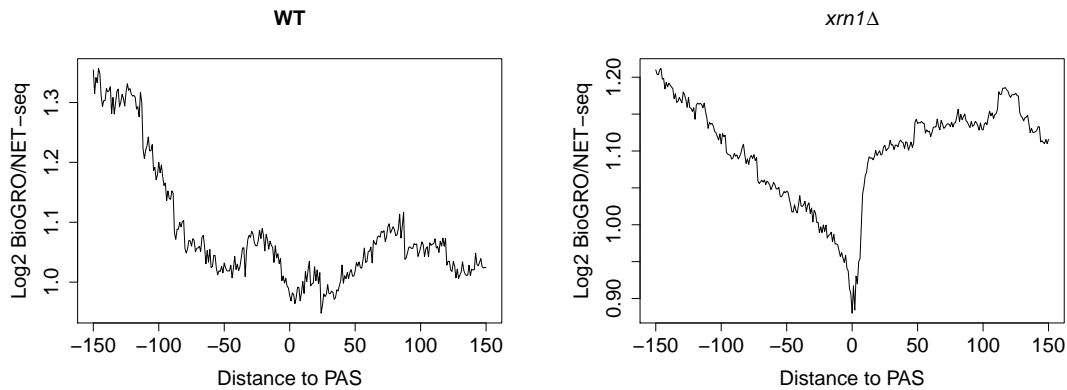

**Fig. 4 Metagene profiles near PAS in WT and *xrn1* $\Delta$  for Pol II and BioGRO/NET-seq ratios.** (A) We extracted NET-seq reads (-150:150 relative to PAS), normalized, and averaged. Genes were separated into those which are stimulated ( $FC < -2$ ) or repressed by Xrn1 ( $FC > 0$ ). (C) We extracted BioGRO and NET-seq values in the -150:150 region with respect to the PAS for all genes. For each gene, we smoothed the BioGRO and NET-seq profiles and took the  $\log_2$  of their ratios. We then averaged over all genes to yield elongation efficiency metagenes.

420 convergent gene pairs as evidenced by midpoint peaks (Fig. 5). Our results are reminiscent of the  
421 previous demonstration of the Pol II buildup between convergent genes in strains lacking *Elc1*, a  
422 protein which aids in the removal of stalled Pol II (Hobson et al. 2012). This raises an alternative  
423 explanation in which the studied DFs stimulate the degradation of colliding Pol II. To verify  
424 that the accumulation between convergent gene pairs was truly a result of Pol II collisions, we  
425 stratified genes based on the distances between their respective PAS. This analysis demonstrated  
426 that Pol II occupancy between such pairs gradually decreased as a function of the distance from  
427 the midpoints (Fig. S13), suggesting that as the distance between respective PAS increases, Pol  
428 II has more opportunities to terminate in both WT and mutant strains. This is consistent with  
429 a model wherein Pol II normally terminates within a window 100-200 bp downstream of PAS  
430 but instead continues to transcribe further downstream in mutant strains because of less efficient  
431 termination. As a point of reference, we also performed this analysis for divergent pairs, finding  
432 only the expected differences due to reduced Pol II occupancy downstream of TSS (Fig. 5B).

### 433 **Transcription in non-coding regions is also compromised by DF deletions**

434 NET-seq provides an opportunity to monitor the production of unstable transcripts because it  
435 quantifies bound Pol II rather than mature RNAs and is little affected by RNA stability. Con-  
436 sequently, we investigated the effect of DF deletions on the transcription of non-coding RNAs  
437 (ncRNAs) by considering the changes in Pol II occupancy at chromosomal loci encoding cryptic  
438 unstable transcripts (CUTs), *Nrd1*-unterminated transcripts (NUTs), stable unannotated tran-  
439 scripts (SUTs), and *Xrn1*-sensitive unstable transcripts (XUTs). Both CUTs and SUTs frequently  
440 originate in the nucleosome free regions (NFRs) upstream of sense promoters and often run an-  
441 tisense to protein-coding genes, posing the possibility of *cis*-regulatory roles (Bumgarner et al.  
442 2009; Tisseur et al. 2011). Most CUTs are rapidly degraded by the exosome while SUT degra-  
443 dation is more reliant on *Xrn1* activity (Xu et al. 2009), though it has been noted that some  
444 CUTs are also degraded by *Xrn1* (Marquardt et al. 2011). XUTs comprise an additional class of  
445 regulatory ncRNAs which are degraded by *Xrn1* and whose transcript levels increase substantially  
446 in *Xrn1*'s absence (van Dijk et al. 2011). As CUTs and SUTs are to varying degrees degraded  
447 by *Xrn1* and XUTs are by definition sensitive to its deletion, nascent transcriptional changes

## A Convergent gene pairs

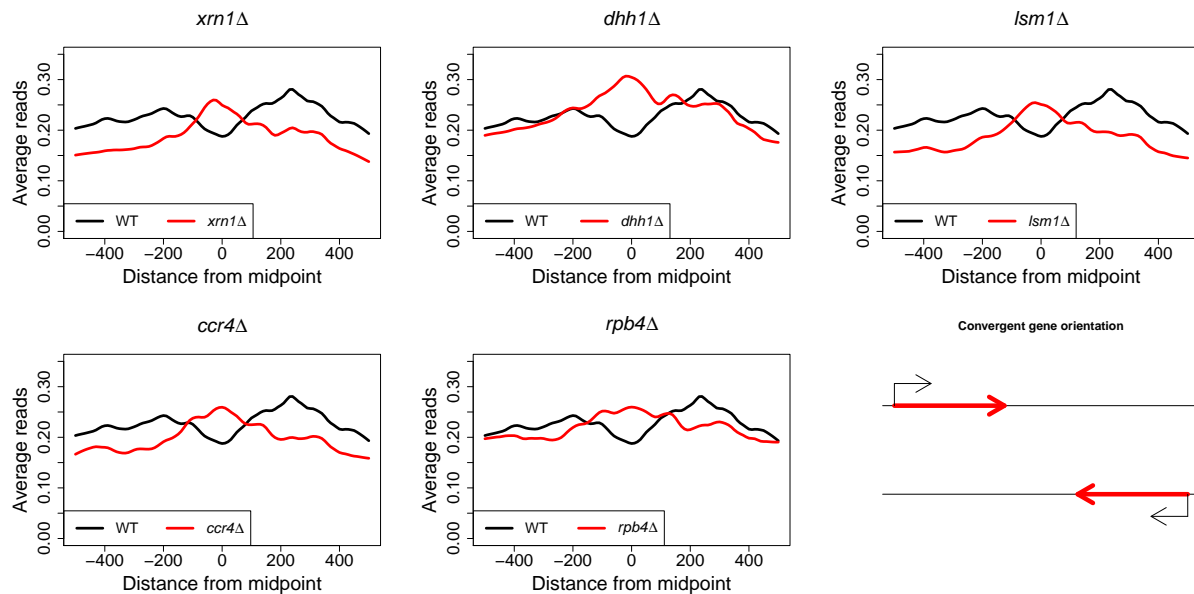

## B Divergent gene pairs

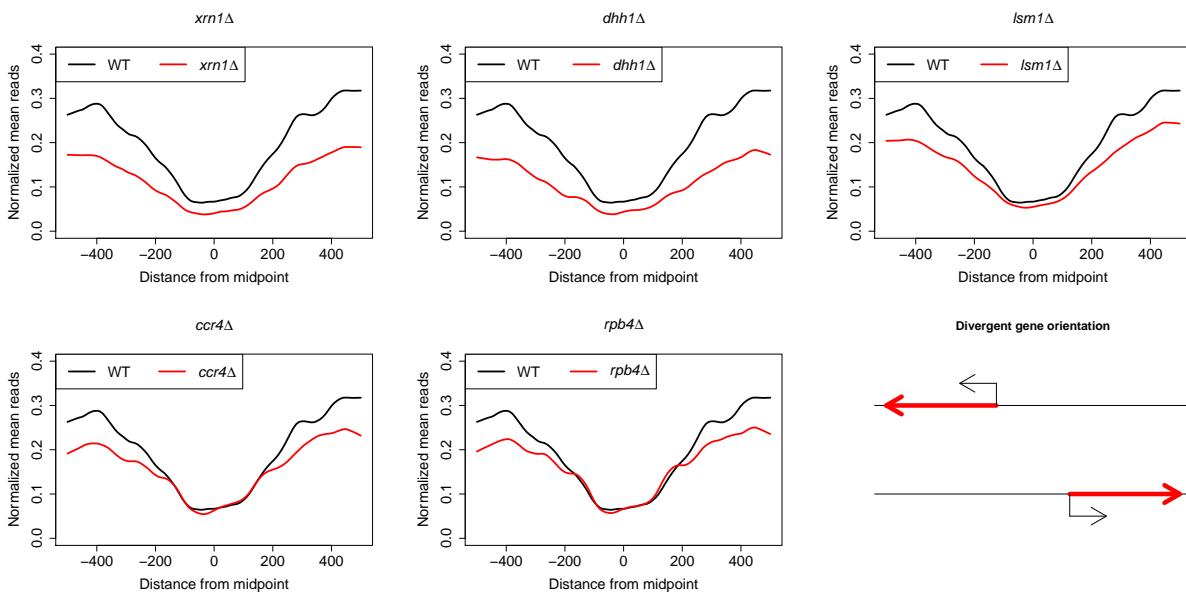

**Fig. 5 Metagenes for convergent and divergent gene pairs.** Convergent and divergent gene pairs were determined by the lengths between their PAS (convergent) and TSS (divergent). Midpoints between genes were defined as the halfway point between these respective features, and gene distances were computed as the difference between the annotated features on the negative and positive strand, respectively. Normalized NET-seq reads were then extracted for sites within 500 bp of gene midpoints and subsequently averaged to produce the metagenes profiles.

448 in the *xrn1* $\Delta$  samples are especially relevant to understanding the interconnectedness of RNA  
449 synthesis and decay for non-coding transcripts. Finally, NUTs are transcripts whose termination  
450 is altered after the nuclear depletion of Nrd1, resulting in longer transcripts (Schulz et al. 2013).  
451 Computation of NET-seq fold changes across gene bodies demonstrated global reductions in Pol  
452 II occupancy in *xrn1* $\Delta$ , *dhh1* $\Delta$ , and *rpb4* $\Delta$  (Fig. S14). Interestingly, the effect of deleting *XRN1*,  
453 *DHH1*, and *RPB4* on the transcription of CUTs and NUTs was higher than their effect on the  
454 transcription of coding genes. In contrast, no effect of deleting *LSM1* on ncRNA transcription  
455 was observed. Somewhat unexpectedly, Pol II occupancy in NUT loci was highly affected by the  
456 deletion of *XRN1* whereas that of XUTs, degraded mainly by Xrn1 (van Dijk et al. 2011), showed  
457 the smallest sensitivity to *XRN1* deletion (Fig. S14).

458 To see if distributional changes in Pol II also appeared in ncRNAs, we again computed meta-  
459 gene densities (Fig. S15). The impact of DFs at TSS of all ncRNA types resembled those of  
460 protein-coding genes. Specifically, deletion of *RPB4* or *CCR4* had little effect, whereas dele-  
461 tion of other DFs decreased 5'-proximal Pol II occupancy. Interestingly, however, for none of  
462 the metagenes did we observe the increase in Pol II adjacent to PAS that was characteristic of  
463 protein-coding genes, suggesting that the deleted proteins interact differently with the PA ma-  
464 chinery of coding and non-coding genes. Together, these results may signify that the considered  
465 DFs regulate initiation or early elongation in ncRNAs but have no impact on termination, per-  
466 haps as a consequence of differences in the respective mechanisms of polyadenylation in coding  
467 genes and genes encoding ncRNAs.

468 Despite the strong effect of deleting some DFs on transcription of ncRNAs, we found small  
469 anticorrelations between sense and antisense Pol II occupancy, both in WT and deletion strains  
470 (Fig. S16A). Unlike convergent pairs, transcription levels in divergent pairs showed moderate  
471 positive correlations. Broadly speaking, correlations between sense and antisense transcription  
472 are roughly equal no matter if the antisense transcript is a coding gene or a ncRNA. Thus, there  
473 seems to be no obvious global relationship between coding and ncRNA genes, consistent with  
474 what has been reported previously (Murray et al. 2015). Reduced transcription levels in genes  
475 with overlapping convergent transcripts implies that the weak anticorrelation that found among  
476 convergent pairs is primarily driven by the presence or absence of antisense transcripts rather than

477 the transcription levels thereof (data not shown), in agreement with previous proposals (Wery  
478 et al. 2018). It is possible that the positive correlations among divergent pairs were simply due  
479 to the common chromatin environment of nearby divergent promoters (Murray et al. 2015; Xu  
480 et al. 2009). In summary, we could not find any indication that DFs target ncRNA genes in  
481 order to modulate transcription in protein-coding genes. In fact, we found that genes which are  
482 highly sensitive to *XRN1* deletion (i.e. the Xrn1 synthegradon) are less likely to have convergent  
483 antisense transcripts of any type (results not shown).

#### 484 **Transcriptional responses to DF deletions differ between SAGA- and TFIID-** 485 **dominated genes**

486 Prior studies have classified genes as SAGA- or TFIID-dominated according to the measured  
487 changes in mRNA levels after inactivation of central components of the SAGA (mainly Spt3)  
488 and TFIID (mainly Taf1) complexes (Basehoar et al. 2004; Huisinga and Pugh 2004). Genes  
489 which were classified as “SAGA-dominated” comprise about 10% of the yeast genome, many of  
490 which are highly responsive to the environment and are likely to have TATA boxes in their core  
491 promoters (Huisinga and Pugh 2004). Meanwhile, “TFIID-dominated” genes make up most of  
492 the remaining 90% of genes and are frequently housekeeping genes and containing TATA-like  
493 elements in their core promoters (Huisinga and Pugh 2004). However, analyses such as these  
494 which interrogate changes in mRNA levels are unable to distinguish between the contributions of  
495 mRNA synthesis and decay. Recently, it was discovered that all promoters recruit both SAGA  
496 and TFIID (Baptista et al. 2017; Bonnet et al. 2014; Warfield et al. 2017); mutations in either  
497 complex resulted in defective transcription, but in most cases mRNA levels were unaffected due  
498 to feedback mechanisms (Baptista et al. 2017; Bonnet et al. 2014; Warfield et al. 2017). We  
499 therefore examined whether our studied DFs are differentially involved with the two groups of  
500 genes by comparing the fold changes in Pol II levels of genes in each group after deletions of DFs  
501 (Fig. 6A). As expected, we found decreases in Pol II occupancy in TFIID genes due to *XRN1*  
502 deletion. However, median Pol II occupancy in “SAGA-dominated” genes remained unaffected in  
503 *xrn1* $\Delta$ , *lsm1* $\Delta$ , and *rpb4* $\Delta$  strains and even slightly increased in *ccr4* $\Delta$  and *dhh1* $\Delta$  strains (Fig.  
504 6A). Note, however, that these results refer to Pol II occupancy along the entire gene. We next

505 compared fold changes in NET-seq reads near TSS and PAS (Fig. 6B), finding that DF deletions  
506 affected TFIID-dominated genes more than SAGA-dominated genes.

507 The discrepancy between mRNA levels and transcription rates suggests that an important  
508 aspect of the division between SAGA- and TFIID-dominated genes may lie in the regulation of  
509 transcript decay, possibly mediated by DFs (see above). To explore this possibility, we analyzed  
510 publicly available UV cross-linking and analysis of cDNA (CRAC) data for Ski2 and Xrn1 (Tuck  
511 and Tollervey 2013). Whereas Xrn1 is the key enzyme of the 5' – 3' mRNA decay process, Ski2  
512 serves as a vital component of the exosome and thus represents the 3' – 5' cytoplasmic decay  
513 pathway. We found that each of these proteins bound to both classes of genes, suggesting that  
514 they play a role in the decay of transcripts regardless of complex annotations (Fig. 6C). However,  
515 both Ski2 and Xrn1 bind more frequently to SAGA-dominated genes than TFIID-dominated genes  
516 even after accounting for transcript length and steady-state mRNA levels. The discrepancy was  
517 stronger for Ski2, as this protein bound to mRNAs from SAGA-dominated genes at nearly twice  
518 the rate compared to TFIID-dominated genes ( $\sim 1.86\times$ ). Moreover, we estimated Xrn1 binding  
519 for SAGA-dominated transcripts to be roughly  $1.47\times$  the rate as for TFIID-dominated transcripts.  
520 That binding of Ski2 occurs at a higher comparative rate between classes than Xrn1 suggests that  
521 the decay of SAGA-dominated transcripts is more dependent on the exosome than the Xrn1-led  
522 5' – 3' pathway. At any rate, SAGA- and TFIID-dominated genes are differentiated by Xrn1 and  
523 Ski2 binding. However, despite the higher binding rates for both proteins, a comparison of the  
524 half-lives of mRNAs from SAGA- and TFIID-dominated genes based on previously published data  
525 (Medina et al. 2014) failed to detect a discernible difference (Fig. 6D). Thus, on one hand, both  
526 the SAGA and TFIID complexes regulate transcription of all genes (Baptista et al. 2017; Bonnet  
527 et al. 2014; Warfield et al. 2017) and their respective transcripts have comparable half-lives (Fig.  
528 6D); conversely, transcription of SAGA- and TFIID-dominated genes is differentially affected by  
529 deletions of the studied DFs (Figs. 6A, 6B) and binding of Xrn1 and Ski2 to their respective  
530 transcripts differentiates between SAGA- and TFIID-dominated genes (Fig. 6C).

531 Inspired by the different effects of DFs on SAGA and TFIID genes, we explored the DNA  
532 binding patterns of three decay factors by analyzing previously generated ChIP-exo data for  
533 Dcp2, Lsm1, and Xrn1 (Haimovich et al. 2013) after stratifying genes according to their “classical”



### A Whole gene standardized Pol II FCs

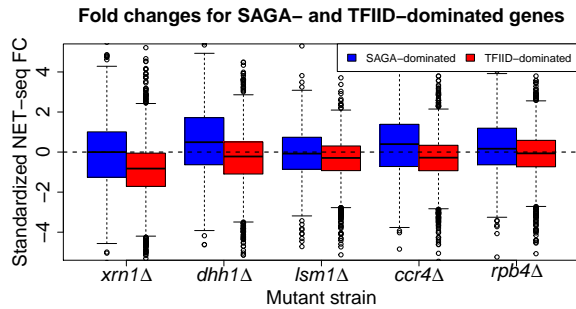

### E ChIP-exo binding in 5' regions

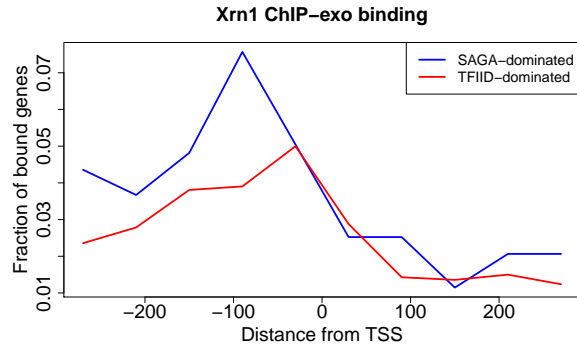

### B Log<sub>2</sub> FCs near TSS and PAS, *xrn1Δ*

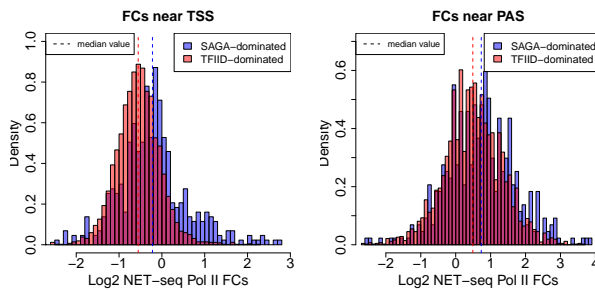

### Lsm1 ChIP-exo binding

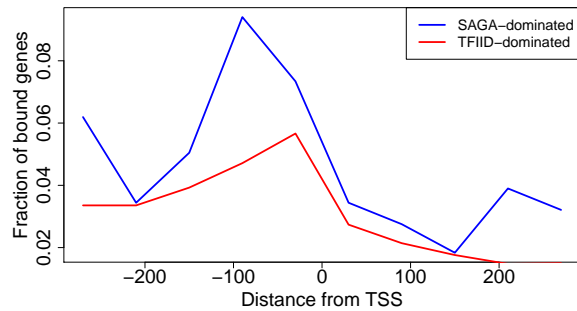

### C DF binding

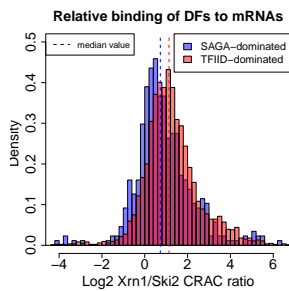

### D mRNA HLs

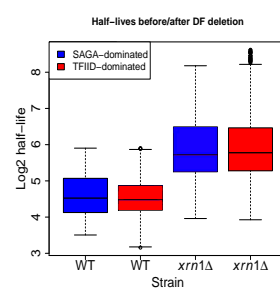

### Dcp2 ChIP-exo binding

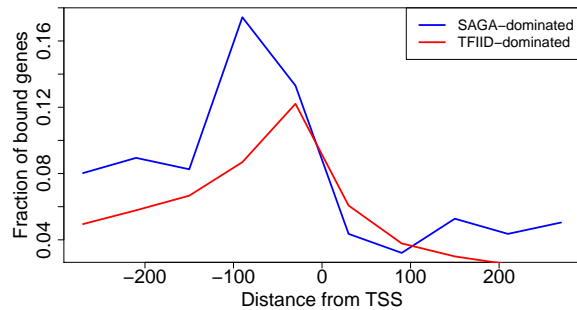

**Fig. 6 Comparison of transcription, decay, and protein binding for SAGA- and TFIID-dominated genes.** (A) Fold changes, computed as in Fig. 1A, for SAGA- or TFIID-dominated genes, as indicated. (B) Histograms of log<sub>2</sub> NET-seq Pol II FCs for regions near TSS (-100:500) and PAS (-150:150) in *xrn1Δ*. (C) Xrn1 and Ski2 CRAC data (Tuck and Tollervy 2013) mapped to each gene were summed and the log<sub>2</sub> ratio of mapped reads for each DF in each gene was taken. (D) Comparison of mRNA half-lives before and after XRN1 deletion (Medina et al. 2014). (E) Reads were binned into windows of 60 bp starting 300 bp upstream and extending 300 bp downstream of TSS. The proportion of bins having more than 10 recorded reads was then computed across the genome and plotted (Haimovich et al. 2013).

534 SAGA/TFIID labels. We found that all three proteins bind to SAGA-dominated genes at higher  
535 frequencies than TFIID-dominated genes (Fig. 6E). These proteins tend to bind further upstream  
536 of TSS for SAGA-dominated genes (peak  $\sim 90$  bp) compared to TFIID-dominated genes ( $\sim 30$   
537 bp), further highlighting the distinction between the two classes. Given the recent finding that  
538 SAGA localizes further upstream than TFIID and binds more frequently in SAGA-dominated  
539 than TFIID-dominated promoters (Baptista et al. 2017), it is possible that the interactions of  
540 Dcp2, Lsm1, and Xrn1 with promoters are influenced by the positions of bound SAGA and  
541 TFIID complexes as well as their binding frequencies. The higher binding rates of each protein  
542 to SAGA-dominated genes is somewhat surprising given that transcription of SAGA-dominated  
543 genes is less impacted by DF deletion, but perhaps reflects the observation that Xrn1 prefers  
544 to bind mRNAs of SAGA-dominated genes over those which are TFIID-dominated. It is also  
545 possible that the respective ChIP-exo profiles differ due to technical artifacts arising from the  
546 accessibility differences of the TAP-tag used to pull down DFs due to differing configurations of  
547 DFs within the two complexes. In any event, these results highlight the capacity of the studied  
548 DFs to differentiate between SAGA- and TFIID-dominated genes.

549 In summary, transcription in both SAGA- and TFIID-dominated genes is dependent on the  
550 SAGA and TFIID complexes, and their mRNA products have comparable half-lives in WT and  
551 in *xrn1* $\Delta$  strains. However, SAGA- and TFIID-dominated genes differ by (i) the effect that the  
552 studied DFs have on their transcription, (ii) chromatin binding features of Xrn1, Lsm1 and Dcp2,  
553 and (iii) the binding of Xrn1 and Ski2 to their mRNAs.

## 554 Discussion

555 In recent years, interest in understanding the cross talk between mRNA synthesis and decay  
556 has grown. Under optimal proliferation conditions, various mRNA decay factors are involved  
557 in mRNA “buffering”, a feedback mechanism that minimizes changes in mRNA levels. In this  
558 coupling, reductions in either mRNA synthesis or decay are associated with compensatory reduc-  
559 tions in the other process, resulting in relatively consistent concentrations of mRNAs. Although  
560 Xrn1 was identified as an effector of buffering, its mode of action has remained controversial (see  
561 Introduction). Using NET-seq, we found that the deletion of *XRN1* generally resulted in the

562 downregulation of transcription (Fig. 1A) and notably reduced the elongation efficiency of Pol  
563 II (BioGRO/NET-seq, Figs. 3B, 4B), consistent with a role for Xrn1 as a stimulator (Haimovich  
564 et al. 2013; Medina et al. 2014) rather than repressor (Sun et al. 2013) of transcription. As a  
565 transcriptional activator, Xrn1 primarily targets genes required for proliferation under optimal  
566 conditions, when cells are dependent mainly on fermentation (Figs. S4B, S4C). These GO terms  
567 are similar to those that characterize the Xrn1 synthegraddon group identified by a GRO-based  
568 analysis (Medina et al. 2014). We also found that the absence of Xrn1 results in increased Pol  
569 II levels of a minor population of relatively lowly expressed genes that mainly encode proteins  
570 related to aerobic metabolism (Figs. S4A, S4C). Given earlier findings of direct binding of Xrn1  
571 and Lsm1 (Haimovich et al. 2013) and our finding that these proteins bind promoters of both  
572 stimulated and repressed genes as well (results not shown), we suspect that this effect is direct.  
573 Thus, Xrn1 seems to be one of the factors that coordinates gene expression to permit efficient  
574 proliferation when fermentation is preferred. Our work also uncovered an underlying function  
575 by which Xrn1 targets transcription initiation and Pol II processivity, possibly via pausing and  
576 backtracking. Recent studies have reported that the release of promoter-proximal paused meta-  
577 zoan Pol II is a crucial component of the regulation of transcription under both optimal (Sheridan  
578 et al. 2019) and stress conditions (Bartman et al. 2019; Sheridan et al. 2019) (see Introduction).  
579 Though not as severe as in *S. pombe* or metazoans, promoter proximal Pol II accumulation has  
580 been reported in *S. cerevisiae* (Churchman and Weissman 2011; Baptista et al. 2017; Feldman and  
581 Peterson 2019), but the underlying cause is uncharacterized (Adelman and Lis 2012). This early  
582 build-up of Pol II has been implicated as a “checkpoint” of Pol II elongation regulated by the  
583 CTD kinase Kin28 (Rodríguez-Molina et al. 2016). Moreover, depletion of sirtuin proteins (Hst3  
584 and Hst4) increases 5' proximal accumulation (Feldman and Peterson 2019). Thus, although the  
585 correspondence to mammalian Pol II pausing remains unclear, it seems that Pol II is subject to  
586 promoter-proximal regulation in *S. cerevisiae* as well. Here we show that Xrn1 and other yeast  
587 DFs also likely modulate this type of regulation in genes which they upregulate. We also note  
588 reductions in initiation rates for many genes across mutants and demonstrate via mathematical  
589 modeling that both initiation and elongation rate reductions are necessary to recapitulate ob-  
590 served Pol II profiles. Furthermore, we showed that while initiation rate changes appear to be

591 restricted to a subset of genes, elongation rate changes are more ubiquitous, as metagenes of both  
592 activated and repressed genes displayed flatter Pol II profiles in mutants than the WT (Figs.  
593 3A, 3C, S6). Recently, Pol II was shown to frequently backtrack in promoter-proximal regions  
594 of human genes, with TFIIS-stimulated RNA cleavage helping to release Pol II from pause sites  
595 (Bartman et al. 2019; Sheridan et al. 2019). Pol II backtracking can be evaluated by compar-  
596 ing BioGRO to NET-seq because backtracked Pol II cannot elongate in vitro. Hence, whereas  
597 NET-seq putatively captures all bound Pol II, BioGRO only detects those which are productively  
598 elongating, and the elongation efficiency can be determined by considering the ratio of BioGRO  
599 to NET-seq reads. High elongation efficiency was observed in WT cells for the first ~30 bp down-  
600 stream of TSS (roughly coincident with capping), followed by a gradual drop until around 100  
601 bp downstream, suggesting that Pol II backtracks with increasing frequency as it approaches the  
602 ~100 bp mark post-TSS, as was found in mammalian cells (Bartman et al. 2019; Sheridan et al.  
603 2019). In the absence of Xrn1, this pattern is disrupted (Fig. 3B), suggesting that the normal  
604 regulation of backtracking is compromised. DFs have previously been implicated to function in  
605 the context of backtracking. For example, Ccr4 has been shown to physically interact with TFIIS  
606 and to directly modulate backtracking in conjunction with TFIIS (Dutta et al. 2015; Kruk et al.  
607 2011). Likewise, Dhh1, Pat1, and Lsm1 also interact with TFIIS both physically and genetically  
608 (Collins et al. 2007; Costanzo et al. 2010; Costanzo et al. 2016; Dutta et al. 2015; Kuzmin et al.  
609 2018; Miller et al. 2018; Srivas et al. 2016; Wilmes et al. 2008). Recently, Xrn1 was shown to in-  
610 crease TFIIS recruitment to Pol II (Begley et al. 2019), consistent with the role we assign to Xrn1  
611 as a regulator of backtracking. All these observations provide outside credibility to our proposals.  
612 Why, then, do we detect differences in the impact of different DFs on 5' Pol II accumulation?  
613 For example, whereas the deletion of *CCR4* led to enhanced Pol II accumulation (Fig. S6C), the  
614 deletion of *XRN1* led to the obliteration of Pol II accumulation at this position (Fig. 3A). The  
615 simplest explanation is that different DFs differentially affect the initiation/elongation ratio by  
616 targeting initiation, elongation/backtracking, or both as demonstrated using our mathematical  
617 model. This is consistent with the recent report that Xrn1 and Ccr4 differentially regulate Pol II  
618 elongation; namely, whereas deletion of *XRN1* led to increased TFIIS-Pol II interaction, that of  
619 *CCR4* had the opposite effect (Begley et al. 2019). Nonetheless, the exact mechanism remains to

620 be determined. These results do not simply provide insight into a plausible mechanism by which  
621 Xrn1 affects transcription, as they also highlight the need to study pausing and backtracking in  
622 the first  $\sim 100$  bp of transcription units as possible regulatory steps in yeast transcription.

623 Deletions of *XRN1* and other DFs also affects Pol II occupancy at PAS. Pausing at PAS in  
624 WT cells is more apparent in genes activated by DFs rather than those which are repressed, and  
625 deletion of *XRN1*, *DHH1*, or *LSM1* led to notable increases in pausing at PAS of repressed  
626 genes. Additional perturbations manifest as abnormally high read accumulations in the regions  
627 beginning roughly 75 bp upstream of PAS and extending to PAS. We found that as Pol II ap-  
628 proaches PAS its activity gradually decreases and that this reduction is intensified in *xrn1* $\Delta$   
629 strains (Fig. 4B). One possibility is that Xrn1 sterically impedes backward movement of Pol II  
630 (i.e., backtracking), as was proposed for Ccr4 (Kruk et al. 2011; Dutta et al. 2015). Accordingly,  
631 in *xrn1* $\Delta$  and the other mutant strains, backward motion of Pol II is not repressed and therefore  
632 backtracking is enhanced, burdening the TFIIS-stimulated RNA cleavage process and leading to  
633 an accumulation of reads upstream of and at PAS. While our data highlight a unique feature of  
634 PAS and the region immediately upstream of them, more work is required to pinpoint the exact  
635 regulatory mechanisms governing transcription in these regions. It hence remains possible that  
636 unique chromatin architecture and DNA/RNA sequences combined with the recruitment of PA  
637 factors, TFIIS, and some DFs in this region are involved in regulating proper Pol II elongation  
638 rate and PA.

639 Transcription termination occurs downstream of PAS (Mischo and Proudfoot 2013). Cleavage  
640 and polyadenylation factors are presumed to act in the Pol II release step of transcription ter-  
641 mination by allosterically modifying the properties of the transcription elongation complex (for  
642 a recent review, see Porrua et al. 2016). Our studied DFs, which are involved in cleavage and  
643 polyadenylation, further appear to affect termination as well. This was determined indirectly be-  
644 cause NET-seq does not identify transcription termination efficiently (Churchman and Weissman  
645 2012), probably because, for any single gene, termination does not occur at a single locus. Corre-  
646 spondingly, we found that the NET-seq signal decreases gradually as a function of distance from  
647 the 3' ends, consistent with a gradual termination post-PAS. In contrast, the signals in several of  
648 the mutant strains, most notably *rpb4* $\Delta$  and *ccr4* $\Delta$ , increased relative to the WT. We interpreted

649 these results to indicate that transcription termination post-PAS is less efficient in our mutant  
650 cells, thus increasing the probability that two opposing Pol II would collide.

651 We also studied the effects of DF deletions on non-coding transcription. As in the case of  
652 coding genes, overall transcription of non-coding transcripts is compromised upon DF deletion.  
653 Moreover, changes in Pol II occupancy in non-coding regions largely mirrored those in coding  
654 regions, particularly for NUT genes (compare Figs. 2 and S15), which suggests that initiation and  
655 early elongation is affected by the studied DFs similarly in both coding and non-coding regions.  
656 However, changes in non-coding 3'-proximal pausing of Pol II do not match what was observed for  
657 coding genes. First, we note that 3' pausing in ncRNA regions is less apparent than in their coding  
658 counterparts, perhaps implying that they are regulated differently. Indeed, production of the 3'  
659 ends of NUTs is controlled by a unique mechanism (Schulz et al. 2013). Perhaps a key distinction  
660 between transcription of coding and non-coding genes lies in the mechanisms controlling their  
661 respective terminations. Analyzing the effects of DFs at PAS of non-coding transcripts revealed  
662 that unlike in coding transcripts, deletions of the studied DFs did not lead to increased 3' Pol II  
663 accumulation, implying that DFs interact differently with the PA machinery of coding and non-  
664 coding regions. Additionally, the lack of correlations between sense and antisense transcription  
665 for multiple ncRNA types and the insignificant effect of DF deletion on these correlations (results  
666 not shown) belies the possibility that regulation of antisense ncRNAs is the preferred mechanism  
667 by which DFs modulate coding transcription. Moreover, we found that genes which are highly  
668 sensitive to *XRN1* deletion (i.e., the Xrn1 synthegradon) are less likely to have convergent anti-  
669 sense transcripts of any type (results not shown), suggesting that convergent ncRNAs are not the  
670 direct mechanism which mediates the effect of Xrn1 on coding regions.

671 Our data highlight additional distinctions between TFIID- and SAGA-dominated genes. On  
672 one hand, both the SAGA and TFIID complexes regulate transcription of nearly all genes (Bonnet  
673 et al. 2014; Baptista et al. 2017; Warfield et al. 2017), and their respective transcripts have  
674 comparable half-lives (Fig. 6D). Cumulative results, shown here and published by others (Tirosh  
675 et al. 2007; Kubik et al. 2015; de Jonge et al. 2017), suggest that the two classes are each  
676 characterized by distinct chromatin structure and different transcriptional plasticity. On the  
677 other hand, we found that deletion of *XRN1*, and to a lesser extent our other studied DFs,

678 affects transcription of TFIID-dependent genes more than SAGA-dominated genes (Figs. 6A, 6B).  
679 Moreover, the binding of Xrn1, Lsm1, and Dcp2 to promoters occurs at different positions between  
680 the two classes, with SAGA-dominated genes having binding sites located further upstream of  
681 TSS than TFIID-dominated genes (Fig. 6E). In addition, we found that both Xrn1 and Ski2 bind  
682 SAGA-dominated gene transcripts more than TFIID-dominated gene transcripts; further, Xrn1  
683 and Ski2 exhibit different preferences to the two classes of mRNAs (Fig. 6C). We thus suggest that  
684 a major difference between SAGA- and TFIID-dominated genes is not related to transcription or  
685 mRNA decay *per se*, but to the steady-state levels of their mRNA products. We propose that the  
686 two classes of genes differ in the buffering mechanisms controlling their mRNA levels, involving a  
687 linkage between RNA and chromatin binding features of some of the factors that we examine in  
688 this paper. In particular, we suggest that the deletions of *TAF1* and *SPT3* compromise the cross  
689 talk between mRNA synthesis and decay for TFIID- and SAGA-dominated genes, respectively,  
690 leading to decreases in steady-state levels of specific mRNAs.

691 Previously, we classified genes based on their sensitivity to *XRN1* deletion (Medina et al.  
692 2014). Genes whose synthesis and transcript stability were highly sensitive to this deletion were  
693 labeled the “Xrn1-sythegradon”. Here we found that our *xrn1Δ* NET-seq data are consistent  
694 with our prior classifications, as Pol II occupancy fold changes nicely correlated with previously  
695 assigned responsiveness values (Fig. 1C, “*xrn1Δ*” panel). Our results further demonstrate that  
696 these scores agree well with NET-seq fold changes of *lsm1Δ*, *dhh1Δ*, and somewhat with *ccr4Δ*,  
697 but not with *rpb4Δ* (Fig. 1C). This raises the possibility that Dhh1 may also function together with  
698 Xrn1 and Lsm1 to link mRNA synthesis and decay, perhaps as part of the previously proposed  
699 complex containing the latter two proteins. In general, our analyses differentiate between two  
700 types of DFs. Type I comprises Xrn1, Lsm1, and Dhh1, the deletion of any one of which reduces  
701 5’ Pol II occupancy and elongation rates of DF-stimulated genes but enhances Pol II pausing  
702 at PAS; Type II includes Ccr4 and Rpb4, whose deletions inhibit the release of Pol II from  
703 positions roughly 100 bp post-TSS or enhance elongation rates downstream of these locations  
704 (Figs. S6C, S6D). This distinction is further underlined by the aforementioned difference in the  
705 correlations between knockout-associated changes in NET-seq signals and Xrn1 responsiveness  
706 (Fig. 1C). Nevertheless, in contrast with the lack of correlation between DFs and the genes of the



707 Rpd3S H4 deacetylation complex, we observed positive correlations among all studied DFs (Fig.  
708 1B). We hence propose that they act similarly at the global level, akin to our previous suggestions  
709 for Xrn1, Lsm1, and Dcp2 (Haimovich et al. 2013).

710 In aggregate, our results point towards roles for Xrn1 and other DFs in facilitating the efficient  
711 elongation of Pol II early and, more clearly, late during transcription, potentially via control of  
712 pausing and backtracking. The identified functions of DFs further highlight the key roles of these  
713 processes in the regulation of transcription. In recent years, promoter-proximal pausing has been  
714 a focal point in the study of transcription of many metazoans; whether Pol II pausing plays a  
715 comparable key role at PAS and in transcription termination of *S. cerevisiae* and other organisms  
716 remains to be examined.

## 717 **Methods**

### 718 **Data collection and pre-processing**

719 We used the NET-seq protocol to measure the number of RNA polymerase II (Pol II) bound to  
720 DNA which are engaged in mRNA synthesis; experiments were performed as detailed in (Church-  
721 man and Weissman 2012). We consider the bound Pol II levels of 4973 genes in six genotypes  
722 comprising one control (in duplicate) and five mutant knockouts (*xrn1* $\Delta$  in duplicate). The data  
723 were pre-processed using cutadapt and prinseq (Martin 2011; Schmieder and Edwards 2011), and  
724 mapping was done via TopHat (Trapnell et al. 2009) with unique reads retained.

### 725 **Identification and interpretation of differentially transcribed genes**

726 Normalization was performed by selecting genes whose productive transcription as measured by  
727 CDTA (*ccr4* $\Delta$ , *dhh1* $\Delta$ , and *lsm1* $\Delta$ ) and GRO (*rpb4* $\Delta$  and *xrn1* $\Delta$ ) was least perturbed (log<sub>2</sub> FC  
728 between  $-0.25$  and  $0.25$ ) by DF deletion (Sun et al. 2012; García-Martínez et al. 2004) as these  
729 are the genes for which we expect the least disruption in transcriptional processes. Each strain  
730 was then separately normalized to wild type samples by using the normalization procedure of  
731 DESeq2 restricted to the appropriate sets of genes (Love et al. 2014).

732 Standardized fold changes of Pol II levels in genes and ncRNAs were computed using DESeq2



733 (Love et al. 2014); these values account for the heteroskedastic mean-variance trend for gene Pol  
734 II counts. Gene ontology (GO) enrichment analyses among genes were performed using GOrilla  
735 in single-ranked list mode (Eden et al. 2007; Eden et al. 2009). Transcriptional efficiencies were  
736 computed by taking the log<sub>2</sub> ratio of GRO to NET-seq reads (for whole genes) or BioGRO to  
737 NET-seq reads (for profiles).

### 738 **Metagene construction**

739 Metagene densities (Figs. 2, S15) for entire transcript bodies were generated by re-scaling each  
740 transcript to a length of 1000 nt. We then aggregated reads across genes and applied lowess  
741 smoothing to create metagene profiles (Fig. 2). The metagene profiles of TSS-adjacent and  
742 PAS-adjacent sites instead display the average number of normalized reads in defined regions.  
743 Specifically, reads no more than 100 nt (500 nt) upstream (downstream) of an annotated TSS  
744 were incorporated for 5' metagenes, while all reads within 150 nt of PAS were aggregated to give  
745 characteristic profiles for Pol II distributions near polyadenylation sites. We computed elongation  
746 efficiency metagenes in the WT and *xrn1Δ* strains by taking BioGRO reads in the same regions  
747 described above and smoothing the profiles for each gene. We then took the log<sub>2</sub> of ratio of  
748 the smoothed BioGRO and NET-seq profiles for each gene and averaged these profiles across all  
749 genes.

### 750 **Application of mathematical model**

751 Our mathematical analysis of initiation and elongation rates is based on the recently obtained  
752 analytical solutions (Erdmann-Pham et al. 2018) to the Totally Asymmetric Simple Exclusion  
753 Process (TASEP). Denoting the NET-seq Pol II metagene for a given sample at position  $x$  as  
754  $\rho(x)$ , site-specific elongation rates  $\lambda(x)$  were approximated as  $\lambda(x) \approx 1/(\rho(x)(1 - \rho(x)))$  after  
755 appropriate re-scaling of  $\rho(x)$  to lie in the interval (0, 1). Ideally, the re-scaling would be given by  
756 the number of cells in each sample such that  $\rho(x)$  is the probability of finding a Pol II at position  
757  $x$ . As these numbers were unknown, a range of re-scalings were tried and the results were robust.  
758 It is worth noting that the actual initiation and elongation rates are not identifiable without the  
759 exact re-scaling; however, the ratio of initiation and elongation rates is, permitting our analysis.

## 760 **Data access**

761 NET-seq data for WT, *xrn1* $\Delta$ , *dhh1* $\Delta$ , *lsm1* $\Delta$ , *ccr4* $\Delta$ , and *rpb4* $\Delta$  cells were generated as part  
762 of this project and accompany this release. External data sets are available as follows:

763 Remaining NET-seq - GSE25107 (Churchman and Weissman 2011); CRAC - GSE46742 (Tuck  
764 and Tollervey 2013); RNA-seq FCs - GSE107841 (He et al. 2018); GRO - GSE29519, GSE57467  
765 (Haimovich et al. 2013; García-Martínez et al. 2015); CDTA - E-MTAB-1525 (Sun et al. 2013);  
766 BioGRO - GSE58859 (Jordán-Pla et al. 2014; Jordán-Pla et al. 2016) and manuscript in progress;  
767 ChIP-exo - GSE44312 (Haimovich et al. 2013); mRNA half-lives accompany Medina et al. 2014.

## 768 **Acknowledgments**

769 We thank Sebastián Chavez, José E. Pérez-Ortín, and Antonio Jordán-Pla for their comments  
770 on our results and use of BioGRO data. We also thank Dan D. Erdmann-Pham for discussions  
771 regarding application of the computational model used for simulations. The research is supported  
772 in part by an Israel Science Foundation grant 1472/15, NIH training grant T32-HG000047, NIH  
773 grant R01-GM094402, and a Packard Fellowship for Science and Engineering. NY and YSS are  
774 Chan Zuckerberg Biohub Investigators.

## 775 **Author contributions**

776 MC conceived the study and performed the experiments with some assistance from LSC. JdI  
777 performed the data pre-processing. JF performed the statistical and computational analyses with  
778 suggestions from MC, YSS, and NY. JF and MC wrote the manuscript. YSS, NY, and LSC  
779 critically read the manuscript.

## 780 **Disclosure declaration**

781 The authors declare no conflicts of interest.

## 782 References

- 783 Adelman K and Lis JT. 2012. Promoter-proximal pausing of RNA polymerase II: emerging roles  
784 in metazoans. *Nature Reviews Genetics*. **13**: 720.
- 785 Baptista T, Grünberg S, Minoungou N, Koster MJ, Timmers HM, Hahn S, Devys D, and Tora L.  
786 2017. SAGA is a general cofactor for RNA polymerase II transcription. *Molecular Cell*. **68**:  
787 130–143.
- 788 Bartman CR, Hamagami N, Keller CA, Giardine B, Hardison RC, Blobel GA, and Raj A. 2019.  
789 Transcriptional burst initiation and polymerase pause release are key control points of tran-  
790 scriptional regulation. *Molecular Cell*. **73**: 519–532.
- 791 Basehoar AD, Zanton SJ, and Pugh BF. 2004. Identification and distinct regulation of yeast  
792 TATA box-containing genes. *Cell*. **116**: 699–709.
- 793 Begley V, Corzo D, Jordán-Pla A, Cuevas-Bermúdez A, Miguel-Jiménez Ld, Pérez-Aguado D,  
794 Machuca-Ostos M, Navarro F, Chávez MJ, Pérez-Ortín JE, et al. 2019. The mRNA degrada-  
795 tion factor Xrn1 regulates transcription elongation in parallel to Ccr4. *Nucleic Acids Research*.
- 796 Bentley DL. 2014. Coupling mRNA processing with transcription in time and space. *Nature*  
797 *Reviews Genetics*. **15**: 163.
- 798 Bonnet J, Wang CY, Baptista T, Vincent SD, Hsiao WC, Stierle M, Kao CF, Tora L, and Devys  
799 D. 2014. The SAGA coactivator complex acts on the whole transcribed genome and is required  
800 for RNA polymerase II transcription. *Genes & Development*. **28**: 1999–2012.
- 801 Braun KA and Young ET. 2014. Coupling mRNA synthesis and decay. *Molecular and Cellular*  
802 *Biology*. **34**: 4078–4087.
- 803 Bregman A, Avraham-Kelbert M, Barkai O, Duek L, Guterman A, and Choder M. 2011. Promoter  
804 elements regulate cytoplasmic mRNA decay. *Cell*. **147**: 1473–1483.
- 805 Bungarner SL, Dowell RD, Grisafi P, Gifford DK, and Fink GR. 2009. Toggle involving cis-  
806 interfering noncoding RNAs controls variegated gene expression in yeast. *Proceedings of the*  
807 *National Academy of Sciences*. **106**: 18321–18326.
- 808 Chen FX, Smith ER, and Shilatifard A. 2018. Born to run: control of transcription elongation by  
809 RNA polymerase II. *Nature Reviews Molecular Cell Biology*. **19**: 464.

- 810 Choder M. 2004. Rpb4 and Rpb7: subunits of RNA polymerase II and beyond. *Trends in Bio-*  
811 *chemical Sciences*. **29**: 674–681.
- 812 Churchman LS and Weissman JS. 2011. Nascent transcript sequencing visualizes transcription at  
813 nucleotide resolution. *Nature*. **469**: 368–373.
- 814 Churchman LS and Weissman JS. 2012. Native elongating transcript sequencing (NET-seq). *Cur-*  
815 *rent Protocols in Molecular Biology*. **98**: 14–4.
- 816 Collins SR, Kemmeren P, Zhao XC, Greenblatt JF, Spencer F, Holstege FC, Weissman JS, and  
817 Krogan NJ. 2007. Toward a comprehensive atlas of the physical interactome of *Saccharomyces*  
818 *cerevisiae*. *Molecular & Cellular Proteomics*. **6**: 439–450.
- 819 Costanzo M, Baryshnikova A, Bellay J, Kim Y, Spear ED, Sevier CS, Ding H, Koh JL, Toufighi  
820 K, Mostafavi S, et al. 2010. The genetic landscape of a cell. *Science*. **327**: 425–431.
- 821 Costanzo M, VanderSluis B, Koch EN, Baryshnikova A, Pons C, Tan G, Wang W, Usaj M,  
822 Hanchard J, Lee SD, et al. 2016. A global genetic interaction network maps a wiring diagram  
823 of cellular function. *Science*. **353**: aaf1420.
- 824 Darzacq X, Shav-Tal Y, De Turris V, Brody Y, Shenoy SM, Phair RD, and Singer RH. 2007. In  
825 vivo dynamics of RNA polymerase II transcription. *Nature Structural & Molecular Biology*.  
826 **14**: 796.
- 827 de Jonge WJ, O’Duibhir E, Lijnzaad P, Leenen D van, Koerkamp MJG, Kemmeren P, and Hol-  
828 stege FC. 2017. Molecular mechanisms that distinguish TFIID housekeeping from regulatable  
829 SAGA promoters. *The EMBO journal*. **36**: 274–290.
- 830 Duek L, Barkai O, Elran R, Adawi I, and Choder M. 2018. Dissociation of Rpb4 from RNA  
831 polymerase II is important for yeast functionality. *PloS One*. **13**: e0206161.
- 832 Dutta A, Babbarwal V, Fu J, Brunke-Reese D, Libert DM, Willis J, and Reese JC. 2015. Ccr4-  
833 Not and TFIIS function cooperatively to rescue arrested RNA polymerase II. *Molecular and*  
834 *Cellular Biology*. **35**: 1915–1925.
- 835 Eden E, Lipson D, Yogeve S, and Yakhini Z. 2007. Discovering motifs in ranked lists of DNA  
836 sequences. *PLoS computational biology*. **3**: e39.
- 837 Eden E, Navon R, Steinfeld I, Lipson D, and Yakhini Z. 2009. GOrilla: a tool for discovery and  
838 visualization of enriched GO terms in ranked gene lists. *BMC Bioinformatics*. **10**: 48.

- 839 Ehrensberger AH, Kelly GP, and Svejstrup JQ. 2013. Mechanistic interpretation of promoter-  
840 proximal peaks and RNAPII density maps. *Cell*. **154**: 713–715.
- 841 Erdmann-Pham DD, Duc KD, and Song YS. 2018. The key parameters that govern translation  
842 efficiency. *bioRxiv*. 440693.
- 843 Feldman JL and Peterson CL. 2019. Yeast Sirtuin Family Members Maintain Transcription Home-  
844 ostasis to Ensure Genome Stability. *Cell Reports*. **27**: 2978–2989.
- 845 García-Martínez J, Aranda A, and Pérez-Ortín JE. 2004. Genomic run-on evaluates transcription  
846 rates for all yeast genes and identifies gene regulatory mechanisms. *Molecular Cell*. **15**: 303–  
847 313.
- 848 García-Martínez J, Delgado-Ramos L, Ayala G, Pelechano V, Medina DA, Carrasco F, González  
849 R, Andrés-León E, Steinmetz L, Warringer J, et al. 2015. The cellular growth rate controls  
850 overall mRNA turnover, and modulates either transcription or degradation rates of particular  
851 gene regulons. *Nucleic Acids Research*. **44**: 3643–3658.
- 852 Goler-Baron V, Selitrennik M, Barkai O, Haimovich G, Lotan R, and Choder M. 2008. Tran-  
853 scription in the nucleus and mRNA decay in the cytoplasm are coupled processes. *Genes &  
854 Development*. **22**: 2022–2027.
- 855 Grosso AR, Almeida SF de, Braga J, and Carmo-Fonseca M. 2012. Dynamic transitions in RNA  
856 polymerase II density profiles during transcription termination. *Genome Research*. **22**: 1447–  
857 1456.
- 858 Gutiérrez G, Millán-Zambrano G, Medina DA, Jordán-Pla A, Pérez-Ortín JE, Peñate X, and  
859 Chávez S. 2017. Subtracting the sequence bias from partially digested MNase-seq data reveals  
860 a general contribution of TFIIS to nucleosome positioning. *Epigenetics & Chromatin*. **10**: 58.
- 861 Haimovich G, Medina DA, Causse SZ, Garber M, Millán-Zambrano G, Barkai O, Chávez S, Pérez-  
862 Ortín JE, Darzacq X, and Choder M. 2013. Gene expression is circular: factors for mRNA  
863 degradation also foster mRNA synthesis. *Cell*. **153**: 1000–1011.
- 864 He F, Celik A, Wu C, and Jacobson A. 2018. General decapping activators target different subsets  
865 of inefficiently translated mRNAs. *Elife*. **7**: e34409.
- 866 Hobson DJ, Wei W, Steinmetz LM, and Svejstrup JQ. 2012. RNA polymerase II collision inter-  
867 rupts convergent transcription. *Molecular Cell*. **48**: 365–374.

- 868 Huisinga KL and Pugh BF. 2004. A genome-wide housekeeping role for TFIID and a highly  
869 regulated stress-related role for SAGA in *Saccharomyces cerevisiae*. *Molecular Cell*. **13**: 573–  
870 585.
- 871 Hyman LE and Moore CL. 1993. Termination and pausing of RNA polymerase II downstream of  
872 yeast polyadenylation sites. *Molecular and Cellular Biology*. **13**: 5159–5167.
- 873 Jonkers I, Kwak H, and Lis JT. 2014. Genome-wide dynamics of Pol II elongation and its interplay  
874 with promoter proximal pausing, chromatin, and exons. *Elife*. **3**: e02407.
- 875 Jordán-Pla A, Gupta I, Miguel-Jiménez L de, Steinmetz LM, Chávez S, Pelechano V, and Pérez-  
876 Ortín JE. 2014. Chromatin-dependent regulation of RNA polymerases II and III activity  
877 throughout the transcription cycle. *Nucleic Acids Research*. **43**: 787–802.
- 878 Jordán-Pla A, Miguel A, Serna E, Pelechano V, and Pérez-Ortín JE (2016). Biotin-Genomic Run-  
879 On (Bio-GRO): A high-resolution method for the analysis of nascent transcription in yeast.  
880 In: *Yeast Functional Genomics*. Springer, pp. 125–139.
- 881 Kazerouninia A, Ngo B, and Martinson HG. 2010. Poly (A) signal-dependent degradation of un-  
882 processed nascent transcripts accompanies poly (A) signal-dependent transcriptional pausing  
883 in vitro. *RNA*. **16**: 197–210.
- 884 Kruk JA, Dutta A, Fu J, Gilmour DS, and Reese JC. 2011. The multifunctional Ccr4–Not complex  
885 directly promotes transcription elongation. *Genes & Development*. **25**: 581–593.
- 886 Kubik S, Bruzzone MJ, Jacquet P, Falcone JL, Rougemont J, and Shore D. 2015. Nucleosome sta-  
887 bility distinguishes two different promoter types at all protein-coding genes in yeast. *Molecular*  
888 *Cell*. **60**: 422–434.
- 889 Kuehner JN, Pearson EL, and Moore C. 2011. Unravelling the means to an end: RNA polymerase  
890 II transcription termination. *Nature Reviews Molecular Cell Biology*. **12**: 283.
- 891 Kuzmin E, VanderSluis B, Wang W, Tan G, Deshpande R, Chen Y, Usaj M, Balint A, Usaj MM,  
892 Leeuwen J van, et al. 2018. Systematic analysis of complex genetic interactions. *Science*. **360**:  
893 eaao1729.
- 894 Larson DR, Zenklusen D, Wu B, Chao JA, and Singer RH. 2011. Real-time observation of tran-  
895 scription initiation and elongation on an endogenous yeast gene. *Science*. **332**: 475–478.

- 896 Le Martelot G, Canella D, Symul L, Migliavacca E, Gilardi F, Liechti R, Martin O, Harshman K,  
897 Delorenzi M, Desvergne B, et al. 2012. Genome-wide RNA polymerase II profiles and RNA  
898 accumulation reveal kinetics of transcription and associated epigenetic changes during diurnal  
899 cycles. *PLoS Biology*. **10**: e1001442.
- 900 Lotan R, Bar-On VG, Harel-Sharvit L, Duek L, Melamed D, and Choder M. 2005. The RNA poly-  
901 merase II subunit Rpb4p mediates decay of a specific class of mRNAs. *Genes & Development*.  
902 **19**: 3004–3016.
- 903 Lotan R, Goler-Baron V, Duek L, Haimovich G, and Choder M. 2007. The Rpb7p subunit of  
904 yeast RNA polymerase II plays roles in the two major cytoplasmic mRNA decay mechanisms.  
905 *J Cell Biol*. **178**: 1133–1143.
- 906 Love MI, Huber W, and Anders S. 2014. Moderated estimation of fold change and dispersion for  
907 RNA-seq data with DESeq2. *Genome Biology*. **15**: 550.
- 908 Marquardt S, Hazelbaker DZ, and Buratowski S. 2011. Distinct RNA degradation pathways and  
909 3'extensions of yeast non-coding RNA species. *Transcription*. **2**: 145–154.
- 910 Martin M. 2011. Cutadapt removes adapter sequences from high-throughput sequencing reads.  
911 *EMBnet.journal*. **17**: 10–12.
- 912 Mayer A, Landry HM, and Churchman LS. 2017. Pause & go: from the discovery of RNA poly-  
913 merase pausing to its functional implications. *Current Opinion in Cell Biology*. **46**: 72–80.
- 914 Medina DA, Jordán-Pla A, Millán-Zambrano G, Chávez S, Choder M, and Pérez-Ortín JE. 2014.  
915 Cytoplasmic 5'-3' exonuclease Xrn1p is also a genome-wide transcription factor in yeast.  *Fron-*  
916 *tiers in Genetics*. **5**: 1.
- 917 Miller JE, Zhang L, Jiang H, Li Y, Pugh BF, and Reese JC. 2018. Genome-wide mapping of  
918 decay factor–mRNA interactions in yeast identifies nutrient-responsive transcripts as targets  
919 of the deadenylase Ccr4. *G3: Genes, Genomes, Genetics*. **8**: 315–330.
- 920 Mischo HE and Proudfoot NJ. 2013. Disengaging polymerase: terminating RNA polymerase II  
921 transcription in budding yeast. *Biochimica et Biophysica Acta (BBA)-Gene Regulatory Mech-*  
922 *anisms*. **1829**: 174–185.



- 923 Murray SC, Haenni S, Howe FS, Fischl H, Chocian K, Nair A, and Mellor J. 2015. Sense and anti-  
924 sense transcription are associated with distinct chromatin architectures across genes. *Nucleic  
925 Acids Research*. **43**: 7823–7837.
- 926 Porrua O, Boudvillain M, and Libri D. 2016. Transcription termination: variations on common  
927 themes. *Trends in Genetics*. **32**: 508–522.
- 928 Richard P and Manley JL. 2009. Transcription termination by nuclear RNA polymerases. *Genes  
929 & Development*. **23**: 1247–1269.
- 930 Rodríguez-Molina JB, Tseng SC, Simonett SP, Taunton J, and Ansari AZ. 2016. Engineered co-  
931 valent inactivation of TFIIH-kinase reveals an elongation checkpoint and results in widespread  
932 mRNA stabilization. *Molecular Cell*. **63**: 433–444.
- 933 Schmieder R and Edwards R. 2011. Quality control and preprocessing of metagenomic datasets.  
934 *Bioinformatics*. **27**: 863–864.
- 935 Schulz D, Pirkl N, Lehmann E, and Cramer P. 2014. Rpb4 subunit functions mainly in mRNA  
936 synthesis by RNA polymerase II. *Journal of Biological Chemistry*. **289**: 17446–17452.
- 937 Schulz D, Schwalb B, Kiesel A, Baejen C, Torkler P, Gagneur J, Soeding J, and Cramer P. 2013.  
938 Transcriptome surveillance by selective termination of noncoding RNA synthesis. *Cell*. **155**:  
939 1075–1087.
- 940 Shalem O, Groisman B, Choder M, Dahan O, and Pilpel Y. 2011. Transcriptome kinetics is  
941 governed by a genome-wide coupling of mRNA production and degradation: a role for RNA  
942 Pol II. *PLoS Genetics*. **7**: e1002273.
- 943 Sheridan RM, Fong N, D’Alessandro A, and Bentley DL. 2019. Widespread backtracking by RNA  
944 pol II is a major effector of gene activation, 5’ pause release, termination, and transcription  
945 elongation rate. *Molecular Cell*. **73**: 107–118.
- 946 Srivas R, Shen JP, Yang CC, Sun SM, Li J, Gross AM, Jensen J, Licon K, Bojorquez-Gomez A,  
947 Klepper K, et al. 2016. A network of conserved synthetic lethal interactions for exploration of  
948 precision cancer therapy. *Molecular Cell*. **63**: 514–525.
- 949 Sun M, Schwalb B, Pirkl N, Maier KC, Schenk A, Failmezger H, Tresch A, and Cramer P.  
950 2013. Global analysis of eukaryotic mRNA degradation reveals Xrn1-dependent buffering of  
951 transcript levels. *Molecular Cell*. **52**: 52–62.



- 952 Sun M, Schwalb B, Schulz D, Pirkl N, Etzold S, Larivière L, Maier KC, Seizl M, Tresch A,  
953 and Cramer P. 2012. Comparative dynamic transcriptome analysis (cDTA) reveals mutual  
954 feedback between mRNA synthesis and degradation. *Genome Research*. **22**: 1350–1359.
- 955 Tian B and Manley JL. 2017. Alternative polyadenylation of mRNA precursors. *Nature reviews*  
956 *Molecular cell biology*. **18**: 18.
- 957 Tirosh I, Berman J, and Barkai N. 2007. The pattern and evolution of yeast promoter bendability.  
958 *Trends in Genetics*. **23**: 318–321.
- 959 Tisseur M, Kwapisz M, and Morillon A. 2011. Pervasive transcription—lessons from yeast. *Biochimie*.  
960 **93**: 1889–1896.
- 961 Trapnell C, Pachter L, and Salzberg SL. 2009. TopHat: discovering splice junctions with RNA-Seq.  
962 *Bioinformatics*. **25**: 1105–1111.
- 963 Trcek T, Larson DR, Moldón A, Query CC, and Singer RH. 2011. Single-molecule mRNA decay  
964 measurements reveal promoter-regulated mRNA stability in yeast. *Cell*. **147**: 1484–1497.
- 965 Tuck AC and Tollervey D. 2013. A transcriptome-wide atlas of RNP composition reveals diverse  
966 classes of mRNAs and lncRNAs. *Cell*. **154**: 996–1009.
- 967 van Dijk E, Chen C, d’Aubenton-Carafa Y, Gourvennec S, Kwapisz M, Roche V, Bertrand C,  
968 Silvain M, Legoix-Ne P, Loeillet S, et al. 2011. XUTs are a class of Xrn1-sensitive antisense  
969 regulatory non-coding RNA in yeast. *Nature*. **475**: 114.
- 970 Verma-Gaur J, Rao SN, Taya T, and Sadhale P. 2008. Genomewide recruitment analysis of Rpb4,  
971 a subunit of polymerase II in *Saccharomyces cerevisiae*, reveals its involvement in transcription  
972 elongation. *Eukaryotic Cell*. **7**: 1009–1018.
- 973 Warfield L, Ramachandran S, Baptista T, Devys D, Tora L, and Hahn S. 2017. Transcription  
974 of nearly all yeast RNA polymerase II-transcribed genes is dependent on transcription factor  
975 TFIID. *Molecular Cell*. **68**: 118–129.
- 976 Wery M, Gautier C, Describes M, Yoda M, Vennin-Rendos H, Migeot V, Gautheret D, Her-  
977 mand D, and Morillon A. 2018. Native elongating transcript sequencing reveals global anti-  
978 correlation between sense and antisense nascent transcription in fission yeast. *Rna*. **24**: 196–  
979 208.

- 980 Wilmes GM, Bergkessel M, Bandyopadhyay S, Shales M, Braberg H, Cagney G, Collins SR,  
981 Whitworth GB, Kress TL, Weissman JS, et al. 2008. A genetic interaction map of RNA-  
982 processing factors reveals links between Sem1/Dss1-containing complexes and mRNA export  
983 and splicing. *Molecular Cell*. **32**: 735–746.
- 984 Wissink E, Vihervaara A, Tippens N, and Lis J. 2019. Nascent RNA analyses: tracking transcrip-  
985 tion and its regulation. *Nature Reviews Genetics*.
- 986 Xu Z, Wei W, Gagneur J, Perocchi F, Clauder-Münster S, Camblong J, Guffanti E, Stutz F,  
987 Huber W, and Steinmetz LM. 2009. Bidirectional promoters generate pervasive transcription  
988 in yeast. *Nature*. **457**: 1033.
